# Supplementary material for: Simultaneous complementary photoswitching of hemithioindigo tweezers for dynamic guest relocalization
Source: PubMed Central journal article supplement (PMC5899155; doi:10.1038/s41467-018-03912-7), 2018-04-13
Supplement: 41467_2018_3912_MOESM2_ESM.pdf [file 41467_2018_3912_MOESM2_ESM.pdf]

## **Description of Additional Supplementary Files**

File Name: Supplementary Data 1

Description: Geometries of all calculated structures.

File Name: Supplementary Movie 1

Description: Simultaneous complementary photoswitching of two molecular tweezers for dynamic relocation of a guest molecule
