# Supplementary material for: Simultaneous complementary photoswitching of hemithioindigo tweezers for dynamic guest relocalization
Source: PubMed Central journal article supplement (PMC5899155; doi:10.1038/s41467-018-03912-7), 2018-04-13
Supplement: 41467_2018_3912_MOESM3_ESM.pdf [file 41467_2018_3912_MOESM3_ESM.pdf]

# Supplementary Data 1

xyz coordinates of the optimized structures.

| Z-1 (MeO groups pointing to front) |          |         | E-1 (MeO groups pointing to front) |   |         |         |         |
|------------------------------------|----------|---------|------------------------------------|---|---------|---------|---------|
| E = -2747.24288069                 |          |         | E = -2747.24075124                 |   |         |         |         |
| C                                  | 0.6192   | -1.8902 | -1.1799                            | C | -5.8160 | 2.0926  | 0.9460  |
| O                                  | 2.7848   | 0.5948  | 0.1350                             | O | -2.9643 | 0.5542  | -0.5060 |
| C                                  | 0.4283   | -3.2074 | -1.5863                            | C | -6.4116 | 3.2391  | 1.4646  |
| C                                  | 3.0099   | -2.2424 | -0.8803                            | C | -3.6678 | 3.2183  | 0.7144  |
| C                                  | 2.8116   | -3.5620 | -1.2958                            | C | -4.2721 | 4.3645  | 1.2356  |
| C                                  | 1.5423   | -4.0372 | -1.6382                            | C | -5.6225 | 4.3755  | 1.5990  |
| C                                  | 1.8805   | -1.4012 | -0.8245                            | C | -4.4718 | 2.0691  | 0.5633  |
| C                                  | 1.8475   | 0.0140  | -0.3879                            | C | -4.0479 | 0.7603  | 0.0136  |
| C                                  | 0.4830   | 0.6090  | -0.5924                            | C | -5.1570 | -0.2523 | 0.1102  |
| C                                  | 0.1106   | 1.9146  | -0.4547                            | C | -5.1152 | -1.5725 | -0.2326 |
| C                                  | 1.0477   | 3.1456  | -0.3069                            | C | -6.3540 | -2.5037 | -0.3319 |
| C                                  | -3.6745  | 3.8383  | -0.3533                            | C | -2.0836 | -4.4012 | -1.1804 |
| C                                  | -2.4725  | 4.5293  | -0.4888                            | C | -3.4370 | -4.6208 | -1.4195 |
| C                                  | -1.2797  | 3.8197  | -0.5296                            | C | -4.3553 | -3.6346 | -1.0830 |
| C                                  | 0.1140   | 4.3444  | -0.6729                            | C | -5.8444 | -3.6691 | -1.2300 |
| C                                  | -2.4915  | 1.7354  | -0.2870                            | C | -2.5709 | -2.2240 | -0.2558 |
| C                                  | -3.6967  | 2.4397  | -0.2442                            | C | -1.6394 | -3.2104 | -0.5831 |
| C                                  | 1.4889   | 3.2822  | 1.1689                             | C | -6.6766 | -3.0448 | 1.0811  |
| C                                  | -1.2734  | 2.4173  | -0.4426                            | C | -3.9355 | -2.4129 | -0.5266 |
| C                                  | 2.2663   | 3.1675  | -1.2460                            | C | -7.6175 | -1.9013 | -0.9713 |
| H                                  | -4.6114  | 4.3839  | -0.3202                            | H | -1.3573 | -5.1585 | -1.4550 |
| H                                  | 0.2914   | 4.6564  | -1.7086                            | H | -6.1286 | -3.4869 | -2.2733 |
| H                                  | 0.3097   | 5.2151  | -0.0406                            | H | -6.2848 | -4.6278 | -0.9404 |
| H                                  | 2.0900   | 4.1889  | 1.2892                             | H | -7.5257 | -3.7333 | 1.0324  |
| H                                  | 0.6218   | 3.3597  | 1.8311                             | H | -5.8229 | -3.5832 | 1.4999  |
| H                                  | 2.0909   | 2.4264  | 1.4691                             | H | -6.9357 | -2.2339 | 1.7654  |
| H                                  | 3.0271   | 2.4498  | -0.9540                            | H | -8.1664 | -1.2371 | -0.3054 |
| H                                  | 1.9650   | 2.9676  | -2.2785                            | H | -7.3789 | -1.3492 | -1.8837 |
| H                                  | 2.7138   | 4.1663  | -1.2183                            | H | -8.2954 | -2.7177 | -1.2388 |
| H                                  | 3.6664   | -4.2263 | -1.3500                            | H | -3.6746 | 5.2602  | 1.3609  |
| H                                  | 1.4254   | -5.0686 | -1.9521                            | H | -6.0602 | 5.2842  | 1.9974  |
| S                                  | -0.6699  | -0.6884 | -1.0551                            | S | -6.6504 | 0.5557  | 0.6992  |
| H                                  | -2.4710  | 5.6121  | -0.5579                            | H | -3.7696 | -5.5539 | -1.8622 |
| H                                  | -2.5242  | 0.6619  | -0.1647                            | H | -2.2224 | -1.3092 | 0.1930  |
| C                                  | -4.9955  | 1.7116  | -0.0731                            | C | -0.1833 | -2.9851 | -0.3128 |
| C                                  | -5.7027  | 1.2582  | -1.2031                            | C | 0.5389  | -2.0514 | -1.0838 |
| C                                  | -5.5108  | 1.4815  | 1.2169                             | C | 0.4668  | -3.6928 | 0.7177  |
| C                                  | -6.9119  | 0.5855  | -1.0241                            | C | 1.8912  | -1.8420 | -0.8093 |
| C                                  | -6.7217  | 0.8022  | 1.3549                             | C | 1.8199  | -3.4560 | 0.9595  |
| C                                  | -7.4418  | 0.3448  | 0.2471                             | C | 2.5545  | -2.5318 | 0.2098  |
| H                                  | -7.4408  | 0.2184  | -1.8968                            | H | 2.4294  | -1.1014 | -1.3901 |
| H                                  | -7.1249  | 0.6476  | 2.3496                             | H | 2.3151  | -4.0188 | 1.7430  |
| C                                  | -8.7312  | -0.3754 | 0.4158                             | C | 3.9931  | -2.2862 | 0.4936  |
| C                                  | -8.8975  | -1.2922 | 1.4586                             | C | 4.4759  | -2.3402 | 1.8052  |
| C                                  | -9.7910  | -0.1433 | -0.4667                            | C | 4.8842  | -1.9981 | -0.5466 |
| C                                  | -10.1084 | -1.9659 | 1.6144                             | C | 5.8258  | -2.1167 | 2.0705  |
| H                                  | -8.0915  | -1.5198 | 2.1434                             | H | 3.8160  | -2.5278 | 2.6415  |
| C                                  | -10.9992 | -0.8208 | -0.3064                            | C | 6.2302  | -1.7670 | -0.2735 |
| H                                  | -9.7100  | 0.5795  | -1.2677                            | H | 4.5561  | -1.9749 | -1.5771 |
| C                                  | -11.1735 | -1.7394 | 0.7350                             | C | 6.7217  | -1.8266 | 1.0349  |
| H                                  | -12.1090 | -2.2620 | 0.8574                             | H | 7.7653  | -1.6496 | 1.2422  |

---

|   |          |         |         |   |         |         |         |
|---|----------|---------|---------|---|---------|---------|---------|
| C | -5.1702  | 1.4787  | -2.6007 | C | -0.1180 | -1.2675 | -2.1978 |
| H | -5.0258  | 2.5419  | -2.8130 | H | -0.6860 | -1.9214 | -2.8652 |
| H | -4.1992  | 0.9956  | -2.7422 | H | -0.8177 | -0.5221 | -1.8103 |
| H | -5.8595  | 1.0760  | -3.3449 | H | 0.6357  | -0.7467 | -2.7911 |
| C | -4.7790  | 1.9614  | 2.4497  | C | -0.2727 | -4.6921 | 1.5799  |
| H | -3.7808  | 1.5201  | 2.5211  | H | -1.2017 | -4.2709 | 1.9730  |
| H | -4.6426  | 3.0466  | 2.4410  | H | -0.5458 | -5.5925 | 1.0214  |
| H | -5.3302  | 1.6976  | 3.3539  | H | 0.3453  | -5.0017 | 2.4248  |
| O | -11.9705 | -0.5149 | -1.2162 | O | 7.0150  | -1.4829 | -1.3620 |
| O | -10.1627 | -2.8446 | 2.6582  | O | 6.1878  | -2.1912 | 3.3856  |
| C | -11.3572 | -3.5791 | 2.8741  | C | 7.5419  | -1.9601 | 3.7372  |
| H | -11.6003 | -4.2166 | 2.0162  | H | 7.8644  | -0.9490 | 3.4624  |
| H | -11.1666 | -4.2071 | 3.7430  | H | 7.5905  | -2.0678 | 4.8198  |
| H | -12.2052 | -2.9182 | 3.0877  | H | 8.2116  | -2.6937 | 3.2732  |
| C | -13.2333 | -1.1527 | -1.1104 | C | 8.4170  | -1.3662 | -1.1789 |
| H | -13.8362 | -0.7548 | -1.9253 | H | 8.8353  | -1.2003 | -2.1708 |
| H | -13.1483 | -2.2396 | -1.2245 | H | 8.6746  | -0.5172 | -0.5347 |
| H | -13.7228 | -0.9245 | -0.1566 | H | 8.8446  | -2.2826 | -0.7572 |
| C | 4.3990   | -1.7916 | -0.5429 | C | -2.2077 | 3.2330  | 0.3792  |
| C | 4.8668   | -1.8692 | 0.7807  | C | -1.7799 | 3.4791  | -0.9372 |
| C | 5.2525   | -1.3450 | -1.5679 | C | -1.2653 | 2.9963  | 1.3966  |
| C | 6.1852   | -1.5094 | 1.0558  | C | -0.4156 | 3.4545  | -1.2215 |
| C | 3.9607   | -2.3109 | 1.9047  | C | -2.7720 | 3.7220  | -2.0491 |
| C | 6.5647   | -0.9919 | -1.2523 | C | 0.0917  | 2.9843  | 1.0735  |
| C | 4.7684   | -1.2181 | -2.9945 | C | -1.6935 | 2.7099  | 2.8182  |
| C | 7.0553   | -1.0686 | 0.0542  | C | 0.5381  | 3.1926  | -0.2337 |
| H | 6.5482   | -1.5945 | 2.0741  | H | -0.0872 | 3.6449  | -2.2376 |
| H | 3.1731   | -1.5705 | 2.0743  | H | -3.3207 | 2.8039  | -2.2807 |
| H | 3.4700   | -3.2631 | 1.6866  | H | -3.5093 | 4.4837  | -1.7822 |
| H | 4.5213   | -2.4228 | 2.8345  | H | -2.2634 | 4.0455  | -2.9591 |
| H | 7.2116   | -0.6245 | -2.0412 | H | 0.8147  | 2.7601  | 1.8500  |
| H | 4.4214   | -2.1755 | -3.3933 | H | -2.2606 | 3.5402  | 3.2485  |
| H | 3.9294   | -0.5200 | -3.0705 | H | -2.3359 | 1.8259  | 2.8724  |
| H | 5.5674   | -0.8530 | -3.6420 | H | -0.8242 | 2.5310  | 3.4530  |
| C | 8.4585   | -0.6927 | 0.3688  | C | 1.9823  | 3.0847  | -0.5669 |
| C | 9.4942   | -1.0272 | -0.5098 | C | 2.9534  | 3.6605  | 0.2572  |
| C | 8.7582   | -0.0007 | 1.5466  | C | 2.3802  | 2.3620  | -1.6953 |
| C | 10.8093  | -0.6729 | -0.2125 | C | 4.3061  | 3.5063  | -0.0446 |
| H | 9.3053   | -1.5867 | -1.4164 | H | 2.6806  | 4.2439  | 1.1268  |
| C | 10.0757  | 0.3495  | 1.8391  | C | 3.7345  | 2.1987  | -1.9831 |
| H | 7.9807   | 0.3019  | 2.2354  | H | 1.6534  | 1.8805  | -2.3360 |
| C | 11.1173  | 0.0189  | 0.9645  | C | 4.7138  | 2.7711  | -1.1636 |
| O | 11.7444  | -1.0546 | -1.1327 | O | 5.1747  | 4.1160  | 0.8170  |
| O | 10.2580  | 1.0299  | 3.0095  | O | 4.0138  | 1.4406  | -3.0843 |
| H | 12.1355  | 0.2915  | 1.1928  | H | 5.7608  | 2.6355  | -1.3834 |
| C | 13.1071  | -0.7424 | -0.8932 | C | 6.5674  | 3.9903  | 0.5844  |
| C | 11.5688  | 1.4356  | 3.3683  | C | 5.3726  | 1.1949  | -3.4231 |
| H | 13.4745  | -1.2131 | 0.0261  | H | 6.8574  | 4.4204  | -0.3814 |
| H | 13.6575  | -1.1424 | -1.7435 | H | 7.0539  | 4.5480  | 1.3835  |
| H | 13.2706  | 0.3401  | -0.8371 | H | 6.8910  | 2.9437  | 0.6273  |
| H | 11.4687  | 1.9564  | 4.3195  | H | 5.3446  | 0.5955  | -4.3321 |
| H | 12.2371  | 0.5765  | 3.4983  | H | 5.9093  | 2.1286  | -3.6278 |
| H | 11.9975  | 2.1203  | 2.6273  | H | 5.8890  | 0.6305  | -2.6399 |
| H | -0.5553  | -3.5744 | -1.8544 | H | -7.4559 | 3.2468  | 1.7536  |

---

| Z-1 (MeO groups pointing back) |          |         | E-1 (MeO groups pointing back) |   |         |         |         |
|--------------------------------|----------|---------|--------------------------------|---|---------|---------|---------|
| E = -2747.24366795             |          |         | E = -2747.24097001             |   |         |         |         |
| C                              | 0.6693   | -1.9201 | -1.1347                        | C | 5.4680  | 1.8244  | -1.5392 |
| O                              | 2.7780   | 0.6240  | 0.1596                         | O | 2.7149  | 0.5794  | 0.3340  |
| C                              | 0.5070   | -3.2458 | -1.5257                        | C | 6.0004  | 2.8290  | -2.3425 |
| C                              | 3.0656   | -2.2197 | -0.8230                        | C | 3.3259  | 2.9741  | -1.3849 |
| C                              | 2.8960   | -3.5479 | -1.2231                        | C | 3.8656  | 3.9765  | -2.1945 |
| C                              | 1.6378   | -4.0532 | -1.5639                        | C | 5.1803  | 3.9037  | -2.6656 |
| C                              | 1.9191   | -1.4010 | -0.7811                        | C | 4.1534  | 1.8784  | -1.0653 |
| C                              | 1.8555   | 0.0182  | -0.3615                        | C | 3.7804  | 0.7018  | -0.2467 |
| C                              | 0.4805   | 0.5830  | -0.5799                        | C | 4.9144  | -0.2850 | -0.1773 |
| C                              | 0.0821   | 1.8829  | -0.4632                        | C | 4.9241  | -1.4920 | 0.4581  |
| C                              | 0.9939   | 3.1345  | -0.3320                        | C | 6.1886  | -2.3339 | 0.7708  |
| C                              | -3.7404  | 3.7324  | -0.4020                        | C | 1.9756  | -4.1262 | 2.0060  |
| C                              | -2.5521  | 4.4449  | -0.5472                        | C | 3.3274  | -4.2221 | 2.3264  |
| C                              | -1.3454  | 3.7584  | -0.5735                        | C | 4.2211  | -3.3096 | 1.7803  |
| C                              | 0.0382   | 4.3081  | -0.7223                        | C | 5.7096  | -3.2500 | 1.9383  |
| C                              | -2.5161  | 1.6547  | -0.2981                        | C | 2.4138  | -2.2183 | 0.5942  |
| C                              | -3.7351  | 2.3356  | -0.2691                        | C | 1.5086  | -3.1400 | 1.1211  |
| C                              | 1.4250   | 3.3043  | 1.1433                         | C | 6.5249  | -3.2039 | -0.4632 |
| C                              | -1.3116  | 2.3582  | -0.4630                        | C | 3.7716  | -2.2764 | 0.9397  |
| C                              | 2.2164   | 3.1649  | -1.2657                        | C | 7.4330  | -1.5521 | 1.2243  |
| H                              | -4.6879  | 4.2599  | -0.3796                        | H | 1.2695  | -4.8282 | 2.4359  |
| H                              | 0.2128   | 4.6046  | -1.7629                        | H | 5.9752  | -2.7945 | 2.8997  |
| H                              | 0.2146   | 5.1937  | -0.1054                        | H | 6.1869  | -4.2337 | 1.9054  |
| H                              | 2.0077   | 4.2246  | 1.2511                         | H | 7.3933  | -3.8346 | -0.2502 |
| H                              | 0.5535   | 3.3760  | 1.8003                         | H | 5.6866  | -3.8531 | -0.7272 |
| H                              | 2.0419   | 2.4653  | 1.4602                         | H | 6.7607  | -2.5841 | -1.3313 |
| H                              | 2.9900   | 2.4676  | -0.9580                        | H | 7.9499  | -1.0506 | 0.4072  |
| H                              | 1.9244   | 2.9415  | -2.2960                        | H | 7.1803  | -0.8026 | 1.9784  |
| H                              | 2.6437   | 4.1727  | -1.2530                        | H | 8.1438  | -2.2541 | 1.6710  |
| H                              | 3.7642   | -4.1953 | -1.2664                        | H | 3.2475  | 4.8275  | -2.4561 |
| H                              | 1.5431   | -5.0905 | -1.8657                        | H | 5.5675  | 4.7006  | -3.2911 |
| S                              | -0.6444  | -0.7435 | -1.0289                        | S | 6.3549  | 0.3927  | -1.0073 |
| H                              | -2.5721  | 5.5261  | -0.6345                        | H | 3.6770  | -5.0071 | 2.9887  |
| H                              | -2.5273  | 0.5830  | -0.1577                        | H | 2.0519  | -1.4589 | -0.0789 |
| C                              | -5.0191  | 1.5847  | -0.0865                        | C | 0.0635  | -3.0651 | 0.7364  |
| C                              | -5.7159  | 1.0970  | -1.2087                        | C | -0.7301 | -1.9878 | 1.1815  |
| C                              | -5.5311  | 1.3666  | 1.2069                         | C | -0.5024 | -4.0523 | -0.0953 |
| C                              | -6.9109  | 0.4020  | -1.0187                        | C | -2.0653 | -1.9162 | 0.7822  |
| C                              | -6.7279  | 0.6647  | 1.3559                         | C | -1.8425 | -3.9457 | -0.4677 |
| C                              | -7.4375  | 0.1721  | 0.2562                         | C | -2.6466 | -2.8821 | -0.0454 |
| H                              | -7.4295  | 0.0056  | -1.8848                        | H | -2.6573 | -1.0659 | 1.1018  |
| H                              | -7.1308  | 0.5222  | 2.3527                         | H | -2.2736 | -4.7219 | -1.0905 |
| C                              | -8.7112  | -0.5732 | 0.4370                         | C | -4.0678 | -2.7770 | -0.4692 |
| C                              | -8.8331  | -1.5113 | 1.4698                         | C | -4.4448 | -3.1616 | -1.7631 |
| C                              | -9.7895  | -0.3377 | -0.4252                        | C | -5.0333 | -2.2888 | 0.4204  |
| C                              | -10.0341 | -2.2099 | 1.6333                         | C | -5.7828 | -3.0588 | -2.1561 |
| H                              | -7.9837  | -1.7075 | 2.1078                         | H | -3.6881 | -3.5017 | -2.4548 |
| C                              | -10.9850 | -1.0424 | -0.2483                        | C | -6.3670 | -2.1856 | 0.0116  |
| H                              | -9.6940  | 0.4115  | -1.1977                        | H | -4.7399 | -2.0217 | 1.4249  |
| C                              | -11.1086 | -1.9768 | 0.7776                         | C | -6.7439 | -2.5724 | -1.2729 |
| H                              | -12.0352 | -2.5194 | 0.9092                         | H | -7.7768 | -2.4910 | -1.5837 |
| C                              | -5.1861  | 1.3034  | -2.6095                        | C | -0.1687 | -0.9068 | 2.0783  |
| H                              | -5.0648  | 2.3655  | -2.8412                        | H | 0.3454  | -1.3354 | 2.9432  |
| H                              | -4.2044  | 0.8396  | -2.7408                        | H | 0.5567  | -0.2768 | 1.5575  |
| H                              | -5.8647  | 0.8717  | -3.3473                        | H | -0.9710 | -0.2618 | 2.4415  |
| C                              | -4.8116  | 1.8847  | 2.4315                         | C | 0.3132  | -5.2178 | -0.6111 |

---

|   |          |         |         |   |         |         |         |
|---|----------|---------|---------|---|---------|---------|---------|
| H | -3.8043  | 1.4662  | 2.5122  | H | 1.2624  | -4.8846 | -1.0385 |
| H | -4.6981  | 2.9721  | 2.4025  | H | 0.5568  | -5.9310 | 0.1820  |
| H | -5.3586  | 1.6267  | 3.3399  | H | -0.2371 | -5.7589 | -1.3832 |
| O | -12.0939 | -0.8777 | -1.0260 | O | -7.3775 | -1.7265 | 0.8044  |
| O | -10.2486 | -3.1496 | 2.5989  | O | -6.2461 | -3.3997 | -3.3950 |
| C | -9.1996  | -3.4402 | 3.5108  | C | -5.3260 | -3.9095 | -4.3476 |
| H | -8.9134  | -2.5560 | 4.0915  | H | -4.8532 | -4.8342 | -3.9978 |
| H | -9.5948  | -4.1990 | 4.1843  | H | -5.9115 | -4.1221 | -5.2409 |
| H | -8.3171  | -3.8380 | 2.9974  | H | -4.5490 | -3.1764 | -4.5922 |
| C | -12.0436 | 0.0568  | -2.0938 | C | -7.0593 | -1.2498 | 2.1045  |
| H | -13.0207 | 0.0122  | -2.5724 | H | -8.0004 | -0.9070 | 2.5318  |
| H | -11.8661 | 1.0754  | -1.7308 | H | -6.6461 | -2.0445 | 2.7359  |
| H | -11.2713 | -0.2072 | -2.8250 | H | -6.3543 | -0.4124 | 2.0642  |
| C | 4.4435   | -1.7351 | -0.4865 | C | 1.9168  | 3.1058  | -0.8917 |
| C | 4.9074   | -1.7852 | 0.8398  | C | 1.6613  | 3.7664  | 0.3230  |
| C | 5.2908   | -1.2812 | -1.5135 | C | 0.8514  | 2.5959  | -1.6546 |
| C | 6.2153   | -1.3894 | 1.1159  | C | 0.3432  | 3.9043  | 0.7555  |
| C | 4.0078   | -2.2362 | 1.9653  | C | 2.7875  | 4.3030  | 1.1751  |
| C | 6.5923   | -0.8913 | -1.1967 | C | -0.4533 | 2.7496  | -1.1860 |
| C | 4.8098   | -1.1838 | -2.9434 | C | 1.0991  | 1.8547  | -2.9478 |
| C | 7.0790   | -0.9381 | 0.1129  | C | -0.7337 | 3.3977  | 0.0211  |
| H | 6.5771   | -1.4555 | 2.1361  | H | 0.1506  | 4.4362  | 1.6807  |
| H | 3.2026   | -1.5126 | 2.1245  | H | 3.4117  | 3.4876  | 1.5536  |
| H | 3.5400   | -3.2017 | 1.7553  | H | 3.4426  | 4.9748  | 0.6141  |
| H | 4.5674   | -2.3260 | 2.8981  | H | 2.3962  | 4.8509  | 2.0341  |
| H | 7.2326   | -0.5143 | -1.9867 | H | -1.2678 | 2.3206  | -1.7591 |
| H | 4.4893   | -2.1545 | -3.3321 | H | 1.6720  | 2.4567  | -3.6585 |
| H | 3.9533   | -0.5088 | -3.0312 | H | 1.6689  | 0.9367  | -2.7750 |
| H | 5.6016   | -0.8054 | -3.5923 | H | 0.1561  | 1.5768  | -3.4216 |
| C | 8.4693   | -0.5184 | 0.4301  | C | -2.1294 | 3.5340  | 0.5144  |
| C | 9.5235   | -0.8836 | -0.4169 | C | -3.1689 | 3.8185  | -0.3800 |
| C | 8.7258   | 0.2442  | 1.5765  | C | -2.4074 | 3.3717  | 1.8784  |
| C | 10.8287  | -0.4842 | -0.1109 | C | -4.4797 | 3.9379  | 0.0937  |
| H | 9.3171   | -1.4983 | -1.2810 | H | -2.9396 | 3.9718  | -1.4245 |
| C | 10.0359  | 0.6377  | 1.8687  | C | -3.7226 | 3.4954  | 2.3380  |
| H | 7.8997   | 0.5482  | 2.2029  | H | -1.6032 | 3.1199  | 2.5541  |
| C | 11.0865  | 0.2747  | 1.0286  | C | -4.7582 | 3.7774  | 1.4497  |
| O | 11.9229  | -0.7976 | -0.8647 | O | -5.5565 | 4.2224  | -0.6937 |
| O | 10.3865  | 1.3894  | 2.9525  | O | -4.0958 | 3.3446  | 3.6431  |
| H | 12.0978  | 0.5814  | 1.2598  | H | -5.7735 | 3.8736  | 1.8104  |
| C | 11.7384  | -1.5675 | -2.0430 | C | -5.3576 | 4.3674  | -2.0924 |
| C | 9.3685   | 1.7975  | 3.8545  | C | -3.0904 | 3.0869  | 4.6119  |
| H | 11.0866  | -1.0571 | -2.7610 | H | -4.9522 | 3.4524  | -2.5381 |
| H | 12.7296  | -1.6843 | -2.4786 | H | -6.3428 | 4.5650  | -2.5120 |
| H | 11.3245  | -2.5570 | -1.8182 | H | -4.6932 | 5.2084  | -2.3206 |
| H | 9.8736   | 2.3689  | 4.6318  | H | -3.6084 | 3.0287  | 5.5681  |
| H | 8.6254   | 2.4352  | 3.3630  | H | -2.5782 | 2.1371  | 4.4213  |
| H | 8.8637   | 0.9376  | 4.3089  | H | -2.3510 | 3.8946  | 4.6505  |
| H | -0.4678  | -3.6361 | -1.7929 | H | 7.0205  | 2.7765  | -2.7039 |

---

---

*E*-1 (MeO groups pointing to front, GD3BJ)

E = -2747.52099365

*E*-1 (MeO groups pointing back, GD3BJ)

E = -2747.52363534

|   |         |         |         |   |           |           |           |
|---|---------|---------|---------|---|-----------|-----------|-----------|
| C | -5.8966 | 2.1803  | 0.6115  | C | 5.380773  | 1.675792  | -1.780821 |
| O | -3.2853 | 0.6501  | -1.1945 | O | 2.967429  | 0.989833  | 0.712747  |
| C | -6.3862 | 3.3291  | 1.2242  | C | 5.775879  | 2.464047  | -2.856925 |
| C | -3.6399 | 3.1038  | 0.5309  | C | 3.143112  | 2.647430  | -1.807584 |
| C | -4.1302 | 4.2476  | 1.1609  | C | 3.536359  | 3.420877  | -2.898858 |
| C | -5.4873 | 4.3619  | 1.4809  | C | 4.838256  | 3.335985  | -3.404079 |
| C | -4.5567 | 2.0875  | 0.2305  | C | 4.093459  | 1.779971  | -1.247814 |
| C | -4.2472 | 0.8303  | -0.4713 | C | 3.876234  | 0.891705  | -0.091317 |
| C | -5.3375 | -0.1682 | -0.2329 | C | 4.986260  | -0.111038 | 0.000992  |
| C | -5.2156 | -1.5132 | -0.3229 | C | 4.933262  | -1.284184 | 0.674857  |
| C | -6.3655 | -2.5327 | -0.2375 | C | 6.116193  | -2.215471 | 0.987927  |
| C | -1.9330 | -4.1720 | -0.6339 | C | 1.768421  | -3.647519 | 2.190855  |
| C | -3.2513 | -4.5655 | -0.8409 | C | 3.101312  | -3.853125 | 2.539501  |
| C | -4.2660 | -3.6219 | -0.7319 | C | 4.078646  | -3.016295 | 2.012570  |
| C | -5.7469 | -3.8089 | -0.8838 | C | 5.570691  | -3.073432 | 2.172970  |
| C | -2.6400 | -1.9112 | -0.1834 | C | 2.386381  | -1.780962 | 0.797216  |
| C | -1.6164 | -2.8468 | -0.2892 | C | 1.402792  | -2.625304 | 1.299572  |
| C | -6.6668 | -2.8039 | 1.2514  | C | 6.364760  | -3.125021 | -0.233488 |
| C | -3.9660 | -2.2838 | -0.4339 | C | 3.722280  | -1.953819 | 1.168890  |
| C | -7.6434 | -2.1293 | -0.9818 | C | 7.406409  | -1.497309 | 1.397151  |
| H | -1.1307 | -4.8935 | -0.7364 | H | 0.997843  | -4.293579 | 2.595730  |
| H | -6.0186 | -3.8576 | -1.9444 | H | 5.872532  | -2.623076 | 3.125307  |
| H | -6.1164 | -4.7231 | -0.4118 | H | 5.967688  | -4.091645 | 2.153706  |
| H | -7.4621 | -3.5489 | 1.3431  | H | 7.183864  | -3.818533 | -0.023655 |
| H | -5.7786 | -3.1823 | 1.7627  | H | 5.471495  | -3.707253 | -0.470766 |
| H | -6.9897 | -1.8915 | 1.7563  | H | 6.631090  | -2.534134 | -1.112083 |
| H | -8.1978 | -1.3414 | -0.4718 | H | 7.896794  | -1.003819 | 0.557646  |
| H | -7.4172 | -1.7875 | -1.9943 | H | 7.210907  | -0.746657 | 2.166250  |
| H | -8.3068 | -2.9960 | -1.0535 | H | 8.113549  | -2.226796 | 1.802109  |
| H | -3.4425 | 5.0428  | 1.4228  | H | 2.818072  | 4.088186  | -3.359787 |
| H | -5.8438 | 5.2633  | 1.9663  | H | 5.120745  | 3.952392  | -4.249925 |
| S | -6.8269 | 0.7035  | 0.2746  | S | 6.386591  | 0.457257  | -0.968734 |
| H | -3.4821 | -5.5968 | -1.0846 | H | 3.371870  | -4.666881 | 3.203351  |
| H | -2.3825 | -0.8996 | 0.0794  | H | 2.092790  | -1.001756 | 0.113866  |
| C | -0.1978 | -2.4416 | -0.0674 | C | -0.005074 | -2.438453 | 0.842812  |
| C | 0.4368  | -1.5742 | -0.9785 | C | -0.738073 | -1.307790 | 1.249186  |
| C | 0.5133  | -2.9423 | 1.0387  | C | -0.573847 | -3.365254 | -0.049177 |
| C | 1.7905  | -1.2886 | -0.8084 | C | -2.038134 | -1.131699 | 0.771040  |
| C | 1.8583  | -2.6102 | 1.1917  | C | -1.867430 | -3.149593 | -0.517137 |
| C | 2.5219  | -1.8078 | 0.2603  | C | -2.619060 | -2.039932 | -0.118232 |
| H | 2.2790  | -0.6274 | -1.5118 | H | -2.592927 | -0.251378 | 1.072192  |
| H | 2.4107  | -3.0193 | 2.0302  | H | -2.311335 | -3.876007 | -1.188126 |
| C | 3.9771  | -1.5568 | 0.3818  | C | -4.000607 | -1.860352 | -0.627918 |
| C | 4.5569  | -1.3080 | 1.6272  | C | -4.290165 | -2.166648 | -1.964542 |
| C | 4.7878  | -1.6110 | -0.7555 | C | -5.016691 | -1.421674 | 0.225915  |
| C | 5.9339  | -1.1408 | 1.7354  | C | -5.603371 | -2.059689 | -2.429592 |
| H | 3.9538  | -1.2173 | 2.5199  | H | -3.488302 | -2.471415 | -2.619957 |
| C | 6.1625  | -1.4413 | -0.6384 | C | -6.326511 | -1.319423 | -0.254148 |
| H | 4.3685  | -1.8143 | -1.7312 | H | -4.779713 | -1.190225 | 1.253090  |
| C | 6.7570  | -1.2130 | 0.6059  | C | -6.622009 | -1.646463 | -1.575707 |
| H | 7.8246  | -1.0932 | 0.6943  | H | -7.637343 | -1.566681 | -1.939445 |
| C | -0.3083 | -0.9478 | -2.1317 | C | -0.136133 | -0.279362 | 2.174825  |
| H | -0.9360 | -1.6757 | -2.6505 | H | 0.385234  | -0.753280 | 3.009771  |
| H | -0.9687 | -0.1460 | -1.7917 | H | 0.595452  | 0.345887  | 1.655557  |
| H | 0.3951  | -0.5207 | -2.8481 | H | -0.913256 | 0.375667  | 2.568379  |
| C | -0.1540 | -3.8301 | 2.0629  | C | 0.198968  | -4.573458 | -0.522205 |

---

---

|   |         |         |         |   |           |           |           |
|---|---------|---------|---------|---|-----------|-----------|-----------|
| H | -1.1347 | -3.4415 | 2.3470  | H | 1.194748  | -4.293857 | -0.875260 |
| H | -0.3140 | -4.8432 | 1.6823  | H | 0.342958  | -5.303267 | 0.279355  |
| H | 0.4606  | -3.9070 | 2.9616  | H | -0.328583 | -5.072544 | -1.336773 |
| O | 6.8722  | -1.5026 | -1.8097 | O | -7.384151 | -0.905502 | 0.492952  |
| O | 6.4061  | -0.8813 | 2.9904  | O | -5.984141 | -2.329683 | -3.712245 |
| C | 7.8085  | -0.8399 | 3.1892  | C | -4.993158 | -2.775930 | -4.624053 |
| H | 8.2732  | -0.0149 | 2.6371  | H | -4.533453 | -3.713016 | -4.290963 |
| H | 7.9540  | -0.6786 | 4.2559  | H | -5.510504 | -2.943436 | -5.567132 |
| H | 8.2835  | -1.7829 | 2.8959  | H | -4.210854 | -2.022399 | -4.769200 |
| C | 8.2862  | -1.4222 | -1.7462 | C | -7.142229 | -0.524503 | 1.842096  |
| H | 8.6384  | -1.5312 | -2.7705 | H | -8.103733 | -0.194323 | 2.231276  |
| H | 8.6195  | -0.4551 | -1.3514 | H | -6.782059 | -1.372022 | 2.435549  |
| H | 8.7055  | -2.2265 | -1.1321 | H | -6.425248 | 0.296518  | 1.892270  |
| C | -2.1838 | 2.8940  | 0.2836  | C | 1.757743  | 2.688387  | -1.255626 |
| C | -1.5541 | 3.4705  | -0.8282 | C | 1.411854  | 3.673853  | -0.319909 |
| C | -1.4642 | 2.0576  | 1.1551  | C | 0.842108  | 1.680453  | -1.599756 |
| C | -0.1971 | 3.2319  | -1.0349 | C | 0.149893  | 3.633247  | 0.265896  |
| C | -2.3431 | 4.2914  | -1.8160 | C | 2.411809  | 4.719740  | 0.103102  |
| C | -0.1106 | 1.8359  | 0.9150  | C | -0.413314 | 1.670055  | -0.995446 |
| C | -2.1370 | 1.3746  | 2.3212  | C | 1.221211  | 0.579336  | -2.558999 |
| C | 0.5451  | 2.4259  | -0.1681 | C | -0.772814 | 2.632347  | -0.048528 |
| H | 0.2982  | 3.6986  | -1.8787 | H | -0.122504 | 4.398254  | 0.983961  |
| H | -3.1175 | 3.6759  | -2.2836 | H | 3.269065  | 4.249375  | 0.594410  |
| H | -2.8477 | 5.1351  | -1.3387 | H | 2.800670  | 5.283677  | -0.748182 |
| H | -1.6965 | 4.6808  | -2.6037 | H | 1.963924  | 5.425025  | 0.804725  |
| H | 0.4422  | 1.1724  | 1.5696  | H | -1.101761 | 0.864533  | -1.222186 |
| H | -2.7297 | 2.0763  | 2.9132  | H | 1.627488  | 0.978396  | -3.491852 |
| H | -2.8212 | 0.5882  | 1.9871  | H | 1.991386  | -0.071857 | -2.133600 |
| H | -1.3962 | 0.9109  | 2.9739  | H | 0.356650  | -0.042626 | -2.794200 |
| C | 1.9969  | 2.2187  | -0.3732 | C | -2.083107 | 2.571989  | 0.639236  |
| C | 2.8608  | 2.2286  | 0.7234  | C | -3.242093 | 2.249800  | -0.072422 |
| C | 2.5158  | 2.0296  | -1.6556 | C | -2.146438 | 2.813544  | 2.016571  |
| C | 4.2311  | 2.0702  | 0.5347  | C | -4.467429 | 2.183953  | 0.597816  |
| H | 2.4946  | 2.4041  | 1.7255  | H | -3.178347 | 2.076811  | -1.135813 |
| C | 3.8849  | 1.8364  | -1.8325 | C | -3.374810 | 2.730992  | 2.676258  |
| H | 1.8704  | 1.9891  | -2.5228 | H | -1.234809 | 3.024386  | 2.554505  |
| C | 4.7594  | 1.8652  | -0.7422 | C | -4.534420 | 2.421712  | 1.969527  |
| O | 4.9925  | 2.1328  | 1.6658  | O | -5.651616 | 1.896642  | -0.005881 |
| O | 4.2841  | 1.6027  | -3.1157 | O | -3.537748 | 2.930845  | 4.014994  |
| H | 5.8147  | 1.6967  | -0.8783 | H | -5.484580 | 2.386503  | 2.484367  |
| C | 6.3956  | 2.2710  | 1.5232  | C | -5.651739 | 1.681407  | -1.413768 |
| C | 5.6664  | 1.3865  | -3.3666 | C | -2.389302 | 3.245518  | 4.788666  |
| H | 6.6473  | 3.1659  | 0.9424  | H | -5.010276 | 0.839810  | -1.685919 |
| H | 6.7882  | 2.3681  | 2.5341  | H | -6.679633 | 1.441351  | -1.673205 |
| H | 6.8395  | 1.3916  | 1.0482  | H | -5.333332 | 2.584052  | -1.945917 |
| H | 5.7508  | 1.2485  | -4.4435 | H | -2.743987 | 3.365810  | 5.810708  |
| H | 6.2650  | 2.2555  | -3.0692 | H | -1.648608 | 2.439259  | 4.754111  |
| H | 6.0318  | 0.4904  | -2.8578 | H | -1.923669 | 4.178825  | 4.453857  |
| H | -7.4272 | 3.4140  | 1.5106  | H | 6.775722  | 2.393946  | -3.267277 |

---

| Z-2 (MeO groups pointing to front) |         |         | E-2 (MeO groups pointing to front) |   |          |         |         |  |  |  |
|------------------------------------|---------|---------|------------------------------------|---|----------|---------|---------|--|--|--|
| E = -2747.24767134                 |         |         | E = -2747.24570435                 |   |          |         |         |  |  |  |
| C                                  | -4.1800 | 2.0515  | 0.7389                             | C | 2.0329   | -1.0819 | -1.0475 |  |  |  |
| O                                  | -7.1769 | 0.1758  | 1.1039                             | O | -1.3788  | -0.2917 | -1.6574 |  |  |  |
| C                                  | -3.5223 | 3.2746  | 0.9204                             | C | 3.0394   | -2.0559 | -1.0668 |  |  |  |
| C                                  | -6.2705 | 2.9522  | 1.5698                             | C | 0.3663   | -2.6623 | -1.8180 |  |  |  |
| C                                  | -5.6418 | 4.1749  | 1.7603                             | C | 1.3448   | -3.6463 | -1.8455 |  |  |  |
| C                                  | -4.2877 | 4.3260  | 1.4360                             | C | 2.6597   | -3.3394 | -1.4732 |  |  |  |
| C                                  | -5.5301 | 1.8910  | 1.0494                             | C | 0.7199   | -1.3755 | -1.4124 |  |  |  |
| C                                  | -6.0514 | 0.5353  | 0.7908                             | C | -0.2063  | -0.2302 | -1.3210 |  |  |  |
| C                                  | -4.9941 | -0.3253 | 0.1653                             | C | 0.5118   | 0.9900  | -0.8161 |  |  |  |
| C                                  | -5.1229 | -1.5970 | -0.3148                            | C | 0.0017   | 2.2353  | -0.5838 |  |  |  |
| C                                  | -6.4488 | -2.3597 | -0.5876                            | C | 0.8516   | 3.5041  | -0.2975 |  |  |  |
| C                                  | -2.3059 | -4.5429 | -1.5020                            | C | -3.8739  | 3.9389  | -0.1980 |  |  |  |
| C                                  | -3.6684 | -4.6402 | -1.7736                            | C | -2.7162  | 4.6983  | -0.3424 |  |  |  |
| C                                  | -4.5185 | -3.6224 | -1.3621                            | C | -1.4939  | 4.0533  | -0.4766 |  |  |  |
| C                                  | -6.0009 | -3.5191 | -1.5353                            | C | -0.1356  | 4.6656  | -0.6144 |  |  |  |
| C                                  | -2.6438 | -2.4185 | -0.4068                            | C | -2.5860  | 1.8981  | -0.3130 |  |  |  |
| C                                  | -1.7816 | -3.4409 | -0.8086                            | C | -3.8183  | 2.5364  | -0.1672 |  |  |  |
| C                                  | -6.9796 | -2.9614 | 0.7340                             | C | 1.2079   | 3.5299  | 1.2080  |  |  |  |
| C                                  | -4.0179 | -2.4942 | -0.6907                            | C | -1.4128  | 2.6487  | -0.4907 |  |  |  |
| C                                  | -7.5430 | -1.5417 | -1.2956                            | C | 2.1210   | 3.6874  | -1.1483 |  |  |  |
| H                                  | -1.6338 | -5.3336 | -1.8179                            | H | -4.8353  | 4.4323  | -0.1029 |  |  |  |
| H                                  | -6.2405 | -3.2683 | -2.5750                            | H | 0.0206   | 5.0174  | -1.6411 |  |  |  |
| H                                  | -6.5225 | -4.4525 | -1.3052                            | H | 0.0207   | 5.5235  | 0.0461  |  |  |  |
| H                                  | -7.8757 | -3.5567 | 0.5321                             | H | 1.7765   | 4.4353  | 1.4405  |  |  |  |
| H                                  | -6.2336 | -3.6164 | 1.1931                             | H | 0.3061   | 3.5238  | 1.8252  |  |  |  |
| H                                  | -7.2407 | -2.1719 | 1.4368                             | H | 1.8165   | 2.6669  | 1.4864  |  |  |  |
| H                                  | -7.9934 | -0.8017 | -0.6408                            | H | 2.9509   | 3.0576  | -0.8326 |  |  |  |
| H                                  | -7.1406 | -1.0375 | -2.1790                            | H | 1.9244   | 3.4885  | -2.2048 |  |  |  |
| H                                  | -8.3304 | -2.2240 | -1.6320                            | H | 2.4534   | 4.7261  | -1.0572 |  |  |  |
| H                                  | -7.3152 | 2.7958  | 1.8121                             | H | -0.6612  | -2.8610 | -2.0996 |  |  |  |
| H                                  | -6.1937 | 5.0176  | 2.1599                             | H | 1.0976   | -4.6551 | -2.1547 |  |  |  |
| H                                  | -3.8063 | 5.2866  | 1.5862                             | H | 3.4172   | -4.1158 | -1.4985 |  |  |  |
| S                                  | -3.4308 | 0.5723  | 0.1237                             | S | 2.2609   | 0.6101  | -0.5940 |  |  |  |
| H                                  | -4.0597 | -5.5066 | -2.2963                            | H | -2.7697  | 5.7820  | -0.3447 |  |  |  |
| H                                  | -2.2307 | -1.5927 | 0.1553                             | H | -2.5492  | 0.8217  | -0.3016 |  |  |  |
| C                                  | -2.0780 | 3.4560  | 0.5739                             | C | 4.4499   | -1.7436 | -0.6769 |  |  |  |
| C                                  | -1.0855 | 3.2345  | 1.5478                             | C | 5.3732   | -1.3246 | -1.6542 |  |  |  |
| C                                  | -1.7148 | 3.8550  | -0.7271                            | C | 4.8539   | -1.8744 | 0.6659  |  |  |  |
| C                                  | 0.2540  | 3.4208  | 1.2054                             | C | 6.6859   | -1.0471 | -1.2724 |  |  |  |
| C                                  | -0.3645 | 4.0281  | -1.0305                            | C | 6.1750   | -1.5852 | 1.0077  |  |  |  |
| C                                  | 0.6384  | 3.8181  | -0.0790                            | C | 7.1102   | -1.1706 | 0.0543  |  |  |  |
| H                                  | 1.0172  | 3.2252  | 1.9503                             | H | 7.3878   | -0.7023 | -2.0235 |  |  |  |
| H                                  | -0.0896 | 4.3578  | -2.0262                            | H | 6.4884   | -1.7098 | 2.0382  |  |  |  |
| C                                  | -0.3190 | -3.3771 | -0.4881                            | C | -5.0686  | 1.7301  | 0.0065  |  |  |  |
| C                                  | 0.5592  | -2.6634 | -1.3259                            | C | -5.6260  | 1.0517  | -1.0958 |  |  |  |
| C                                  | 0.1795  | -4.0396 | 0.6503                             | C | -5.6878  | 1.6438  | 1.2688  |  |  |  |
| C                                  | 1.9194  | -2.6311 | -1.0159                            | C | -6.7963  | 0.3129  | -0.9178 |  |  |  |
| C                                  | 1.5452  | -3.9808 | 0.9285                             | C | -6.8528  | 0.8887  | 1.4071  |  |  |  |
| C                                  | 2.4364  | -3.2842 | 0.1069                             | C | -7.4287  | 0.2164  | 0.3252  |  |  |  |
| H                                  | 2.5875  | -2.0617 | -1.6525                            | H | -7.2108  | -0.2210 | -1.7658 |  |  |  |
| H                                  | 1.9263  | -4.5115 | 1.7940                             | H | -7.3333  | 0.8404  | 2.3781  |  |  |  |
| C                                  | 3.8895  | -3.2434 | 0.4177                             | C | -8.6730  | -0.5794 | 0.4924  |  |  |  |
| C                                  | 4.3265  | -3.1316 | 1.7414                             | C | -8.8723  | -1.3471 | 1.6444  |  |  |  |
| C                                  | 4.8348  | -3.3217 | -0.6101                            | C | -9.6578  | -0.5692 | -0.5006 |  |  |  |
| C                                  | 5.6901  | -3.1008 | 2.0305                             | C | -10.0405 | -2.0923 | 1.7983  |  |  |  |
| H                                  | 3.6259  | -3.0387 | 2.5605                             | H | -8.1208  | -1.4038 | 2.4207  |  |  |  |
| C                                  | 6.1969  | -3.2893 | -0.3148                            | C | -10.8234 | -1.3174 | -0.3415 |  |  |  |
| H                                  | 4.5356  | -3.4371 | -1.6434                            | H | -9.5521  | 0.0338  | -1.3927 |  |  |  |

**10**  
E = -1337.80083705

|   |         |         |         |
|---|---------|---------|---------|
| C | -3.0626 | -1.2518 | -0.0307 |
| C | -3.2956 | 0.1109  | -0.0471 |
| C | -2.2667 | 1.0456  | -0.0138 |
| C | -0.9594 | 0.5748  | 0.0302  |
| C | -0.6691 | -0.8189 | 0.0609  |
| C | -1.7493 | -1.7052 | 0.0438  |
| H | -3.8856 | -1.9503 | -0.0733 |
| H | -2.5199 | 2.0949  | -0.0326 |
| C | 1.3816  | 0.3138  | 0.0188  |
| C | 2.7642  | 0.4673  | -0.0320 |
| C | 3.5391  | -0.6862 | -0.0689 |
| C | 2.9907  | -1.9615 | -0.0559 |
| C | 1.6071  | -2.1143 | 0.0027  |
| C | 0.7980  | -0.9812 | 0.0412  |
| H | 3.2584  | 1.4267  | -0.0495 |
| H | 3.6483  | -2.8190 | -0.0868 |
| H | 1.1863  | -3.1062 | 0.0355  |
| C | 0.3134  | 1.3256  | 0.0366  |
| C | 0.4628  | 2.6853  | 0.0676  |
| C | 1.7350  | 3.3331  | 0.0877  |
| C | -0.6326 | 3.6007  | 0.0914  |
| N | 2.7436  | 3.8963  | 0.1047  |
| N | -1.4917 | 4.3730  | 0.1115  |
| N | -4.6998 | 0.5900  | -0.1075 |
| O | -4.8736 | 1.7969  | -0.1446 |
| O | -5.5772 | -0.2589 | -0.1162 |
| N | -1.5958 | -3.1763 | 0.1197  |
| O | -0.7202 | -3.6125 | 0.8535  |
| O | -2.3791 | -3.8482 | -0.5279 |
| N | 5.0168  | -0.5440 | -0.1280 |
| O | 5.6756  | -1.5723 | -0.1559 |
| O | 5.4698  | 0.5893  | -0.1455 |

---

|   |         |         |         |   |          |         |         |
|---|---------|---------|---------|---|----------|---------|---------|
| C | 6.6421  | -3.1794 | 1.0075  | C | -11.0302 | -2.0877 | 0.8087  |
| H | 7.6964  | -3.1558 | 1.2336  | H | -11.9328 | -2.6655 | 0.9297  |
| C | 2.0714  | 4.0105  | -0.4242 | C | 8.5139   | -0.8696 | 0.4399  |
| C | 2.5578  | 3.6037  | -1.6704 | C | 8.7906   | -0.2115 | 1.6423  |
| C | 2.9462  | 4.6001  | 0.4936  | C | 9.5713   | -1.2421 | -0.3959 |
| C | 3.9026  | 3.7844  | -1.9914 | C | 10.1085  | 0.0684  | 2.0018  |
| H | 1.9178  | 3.1166  | -2.3939 | H | 7.9977   | 0.1178  | 2.3007  |
| C | 4.2897  | 4.7789  | 0.1664  | C | 10.8871  | -0.9592 | -0.0313 |
| H | 2.6004  | 4.9523  | 1.4564  | H | 9.3984   | -1.7780 | -1.3198 |
| C | 4.7846  | 4.3739  | -1.0785 | C | 11.1723  | -0.3013 | 1.1707  |
| H | 5.8244  | 4.5124  | -1.3290 | H | 12.1909  | -0.0836 | 1.4507  |
| C | -1.4482 | 2.7920  | 2.9468  | C | 4.9627   | -1.1654 | -3.1002 |
| H | -2.0647 | 3.5379  | 3.4570  | H | 4.6338   | -2.1155 | -3.5312 |
| H | -2.0205 | 1.8601  | 2.9367  | H | 4.1304   | -0.4640 | -3.2059 |
| H | -0.5506 | 2.6298  | 3.5457  | H | 5.7956   | -0.7941 | -3.6996 |
| C | -2.7603 | 4.1058  | -1.7893 | C | 3.8855   | -2.3307 | 1.7328  |
| H | -3.3686 | 3.2149  | -1.9698 | H | 3.0199   | -1.6655 | 1.7984  |
| H | -3.4469 | 4.9058  | -1.4980 | H | 3.5003   | -3.3331 | 1.5246  |
| H | -2.2915 | 4.3905  | -2.7328 | H | 4.3696   | -2.3519 | 2.7106  |
| C | 0.0546  | -1.9281 | -2.5466 | C | -4.9803  | 1.1052  | -2.4622 |
| H | -0.5089 | -2.5899 | -3.2102 | H | -4.8093  | 2.1366  | -2.7831 |
| H | -0.6166 | -1.1088 | -2.2734 | H | -4.0076  | 0.6058  | -2.4692 |
| H | 0.8857  | -1.5050 | -3.1133 | H | -5.6153  | 0.6192  | -3.2053 |
| C | -0.7360 | -4.8130 | 1.5724  | C | -5.1102  | 2.3430  | 2.4794  |
| H | -1.5436 | -4.1832 | 1.9559  | H | -4.0499  | 2.1095  | 2.6076  |
| H | -1.2105 | -5.6548 | 1.0597  | H | -5.1856  | 3.4313  | 2.3968  |
| H | -0.1809 | -5.2086 | 2.4246  | H | -5.6378  | 2.0411  | 3.3860  |
| O | 4.2763  | 3.3440  | -3.2286 | O | 10.2682  | 0.7212  | 3.1902  |
| O | 7.0349  | -3.3813 | -1.3900 | O | -11.7232 | -1.2305 | -1.3657 |
| O | 6.0087  | -2.9822 | 3.3532  | O | -10.1309 | -2.8129 | 2.9554  |
| O | 5.0558  | 5.3726  | 1.1285  | O | 11.8439  | -1.3734 | -0.9129 |
| C | 7.3762  | -2.9300 | 3.7263  | C | -11.2825 | -3.6108 | 3.1765  |
| H | 7.8837  | -2.0656 | 3.2825  | H | -11.3934 | -4.3830 | 2.4064  |
| H | 7.3847  | -2.8308 | 4.8106  | H | -11.1313 | -4.0896 | 4.1428  |
| H | 7.9075  | -3.8468 | 3.4455  | H | -12.1943 | -3.0036 | 3.2156  |
| C | 6.4313  | 5.5985  | 0.8656  | C | 13.2084  | -1.1351 | -0.6053 |
| H | 6.8296  | 6.0777  | 1.7586  | H | 13.7768  | -1.5503 | -1.4361 |
| H | 6.9692  | 4.6594  | 0.6916  | H | 13.4231  | -0.0634 | -0.5233 |
| H | 6.5746  | 6.2640  | 0.0064  | H | 13.5074  | -1.6380 | 0.3216  |
| C | 8.4356  | -3.3812 | -1.1677 | C | -12.9392 | -1.9546 | -1.2716 |
| H | 8.8928  | -3.4717 | -2.1519 | H | -13.4886 | -1.7327 | -2.1852 |
| H | 8.7714  | -2.4481 | -0.7003 | H | -12.7633 | -3.0349 | -1.2119 |
| H | 8.7468  | -4.2299 | -0.5476 | H | -13.5342 | -1.6354 | -0.4080 |
| C | 5.6349  | 3.4669  | -3.6180 | C | 11.5794  | 1.0529  | 3.6191  |
| H | 6.2985  | 2.9044  | -2.9512 | H | 12.0777  | 1.7259  | 2.9118  |
| H | 5.6957  | 3.0462  | -4.6205 | H | 11.4593  | 1.5632  | 4.5734  |
| H | 5.9537  | 4.5153  | -3.6489 | H | 12.1954  | 0.1581  | 3.7653  |

---



---

Z-2 (MeO groups pointing  
back)

E = -2747.24767134

C -4.0412 2.0224 0.6323  
O -7.0152 0.1260 1.0693  
C -3.4003 3.2604 0.7671  
C -6.1445 2.9268 1.4274  
C -5.5325 4.1643 1.5713  
C -4.1804 4.3204 1.2419  
C -5.3893 1.8567 0.9486  
C -5.8936 0.4855 0.7435  
C -4.8247 -0.3873 0.1555  
C -4.9365 -1.6815 -0.2650  
C -6.2529 -2.4734 -0.4995  
C -2.0855 -4.6553 -1.2924  
C -3.4463 -4.7810 -1.5608  
C -4.3074 -3.7508 -1.2071  
C -5.7902 -3.6727 -1.3882  
C -2.4471 -2.4765 -0.3174  
C -1.5741 -3.5108 -0.6613  
C -6.7764 -3.0168 0.8501  
C -3.8202 -2.5827 -0.5964  
C -7.3568 -1.7052 -1.2471  
H -1.4051 -5.4564 -1.5607  
H -6.0295 -3.4758 -2.4395  
H -6.3022 -4.5993 -1.1139  
H -7.6647 -3.6324 0.6773  
H -6.0224 -3.6395 1.3401  
H -7.0480 -2.1980 1.5141  
H -7.8167 -0.9394 -0.6299  
H -6.9602 -1.2407 -2.1546  
H -8.1354 -2.4131 -1.5491  
H -7.1872 2.7656 1.6751  
H -6.0958 5.0143 1.9381  
H -3.7118 5.2924 1.3556  
S -3.2737 0.5294 0.0740  
H -3.8280 -5.6791 -2.0348  
H -2.0430 -1.6158 0.1970  
C -1.9586 3.4531 0.4155  
C -0.9625 3.2697 1.3937  
C -1.6015 3.8330 -0.8928  
C 0.3734 3.4764 1.0485  
C -0.2547 4.0294 -1.1979  
C 0.7523 3.8597 -0.2421  
H 1.1397 3.3079 1.7971  
H 0.0137 4.3504 -2.1983  
C -0.1126 -3.4150 -0.3433  
C 0.7710 -2.8027 -1.2524  
C 0.3801 -3.9479 0.8635  
C 2.1302 -2.7392 -0.9429  
C 1.7453 -3.8618 1.1384  
C 2.6423 -3.2632 0.2481  
H 2.8026 -2.2440 -1.6349  
H 2.1230 -4.2973 2.0571  
C 4.0943 -3.1888 0.5586  
C 4.5177 -2.8725 1.8556  
C 5.0391 -3.4377 -0.4448  
C 5.8855 -2.8063 2.1411  
H 3.7795 -2.6501 2.6123  
C 6.4036 -3.3700 -0.1438  
H 4.6999 -3.7119 -1.4331

---

E-2 (MeO groups pointing  
back)

E = -2747.24637157

C 2.0683 -1.1082 -0.9662  
O -1.3579 -0.4120 -1.6079  
C 3.0950 -2.0611 -0.9498  
C 0.4370 -2.7491 -1.6837  
C 1.4359 -3.7129 -1.6751  
C 2.7432 -3.3657 -1.3115  
C 0.7627 -1.4417 -1.3228  
C -0.1875 -0.3136 -1.2730  
C 0.5040 0.9386 -0.8114  
C -0.0317 2.1812 -0.6262  
C 0.7919 3.4765 -0.3850  
C -3.9420 3.8195 -0.3135  
C -2.7991 4.5962 -0.4816  
C -1.5637 3.9716 -0.5889  
C -0.2176 4.6057 -0.7456  
C -2.6130 1.8021 -0.3509  
C -3.8584 2.4204 -0.2324  
C 1.1438 3.5645 1.1191  
C -1.4544 2.5693 -0.5518  
C 2.0593 3.6544 -1.2400  
H -4.9132 4.2967 -0.2394  
H -0.0657 4.9234 -1.7840  
H -0.0805 5.4899 -0.1163  
H 1.6932 4.4892 1.3193  
H 0.2408 3.5627 1.7346  
H 1.7688 2.7247 1.4300  
H 2.9010 3.0534 -0.9004  
H 1.8692 3.4131 -2.2889  
H 2.3704 4.7022 -1.1865  
H -0.5853 -2.9792 -1.9603  
H 1.2105 -4.7367 -1.9493  
H 3.5166 -4.1266 -1.3085  
S 2.2599 0.6030 -0.5718  
H -2.8742 5.6778 -0.5232  
H -2.5547 0.7278 -0.3010  
C 4.4975 -1.7050 -0.5687  
C 5.4132 -1.2972 -1.5579  
C 4.9018 -1.7818 0.7782  
C 6.7180 -0.9757 -1.1833  
C 6.2151 -1.4504 1.1121  
C 7.1429 -1.0446 0.1474  
H 7.4124 -0.6358 -1.9438  
H 6.5300 -1.5368 2.1462  
C -5.0928 1.5952 -0.0352  
C -5.6305 0.8664 -1.1150  
C -5.7167 1.5408 1.2265  
C -6.7860 0.1098 -0.9158  
C -6.8668 0.7670 1.3863  
C -7.4235 0.0441 0.3269  
H -7.1831 -0.4654 -1.7451  
H -7.3536 0.7460 2.3554  
C -8.6525 -0.7708 0.5166  
C -8.8134 -1.5378 1.6775  
C -9.6509 -0.7721 -0.4657  
C -9.9722 -2.3023 1.8483  
H -8.0218 -1.5545 2.4125  
C -10.8051 -1.5402 -0.2804  
H -9.5293 -0.1522 -1.3421

---

---

|   |         |         |         |   |          |         |         |
|---|---------|---------|---------|---|----------|---------|---------|
| C | 6.8276  | -3.0551 | 1.1453  | C | -10.9673 | -2.3044 | 0.8732  |
| H | 7.8841  | -3.0023 | 1.3718  | H | -11.8616 | -2.8973 | 1.0109  |
| C | 2.1808  | 4.0827  | -0.5884 | C | 8.5378   | -0.6958 | 0.5253  |
| C | 2.6810  | 3.6382  | -1.8186 | C | 8.7833   | 0.0497  | 1.6853  |
| C | 3.0255  | 4.7411  | 0.3140  | C | 9.6063   | -1.1123 | -0.2786 |
| C | 4.0253  | 3.8550  | -2.1390 | C | 10.0984  | 0.3755  | 2.0341  |
| H | 2.0279  | 3.1021  | -2.4917 | H | 7.9487   | 0.3927  | 2.2793  |
| C | 4.3674  | 4.9520  | -0.0207 | C | 10.9163  | -0.7811 | 0.0841  |
| H | 2.6203  | 5.1081  | 1.2458  | H | 9.4062   | -1.7141 | -1.1531 |
| C | 4.8677  | 4.5106  | -1.2438 | C | 11.1633  | -0.0386 | 1.2368  |
| H | 5.9066  | 4.6750  | -1.4966 | H | 12.1782  | 0.2154  | 1.5119  |
| C | -1.3182 | 2.8482  | 2.8009  | C | 5.0022   | -1.1953 | -3.0089 |
| H | -1.9529 | 3.5901  | 3.2941  | H | 4.6964   | -2.1665 | -3.4088 |
| H | -1.8690 | 1.9035  | 2.8092  | H | 4.1538   | -0.5176 | -3.1387 |
| H | -0.4185 | 2.7190  | 3.4049  | H | 5.8271   | -0.8240 | -3.6193 |
| C | -2.6507 | 4.0415  | -1.9605 | C | 3.9421   | -2.2263 | 1.8579  |
| H | -3.2467 | 3.1379  | -2.1170 | H | 3.0612   | -1.5794 | 1.9012  |
| H | -3.3484 | 4.8390  | -1.6897 | H | 3.5805   | -3.2432 | 1.6811  |
| H | -2.1865 | 4.3086  | -2.9114 | H | 4.4246   | -2.2057 | 2.8365  |
| C | 0.2706  | -2.2050 | -2.5477 | C | -4.9782  | 0.8838  | -2.4792 |
| H | -0.2711 | -2.9411 | -3.1482 | H | -4.8267  | 1.9063  | -2.8365 |
| H | -0.4201 | -1.3764 | -2.3667 | H | -3.9953  | 0.4050  | -2.4630 |
| H | 1.1020  | -1.8259 | -3.1446 | H | -5.5984  | 0.3577  | -3.2075 |
| C | -0.5410 | -4.6151 | 1.8596  | C | -5.1607  | 2.2955  | 2.4135  |
| H | -1.3268 | -3.9337 | 2.1979  | H | -4.0967  | 2.0888  | 2.5556  |
| H | -1.0444 | -5.4838 | 1.4256  | H | -5.2577  | 3.3783  | 2.2904  |
| H | 0.0157  | -4.9515 | 2.7359  | H | -5.6875  | 2.0169  | 3.3280  |
| O | 4.6097  | 3.4530  | -3.3046 | O | 10.4409  | 1.1051  | 3.1346  |
| O | 7.4001  | -3.6063 | -1.0456 | O | -11.8373 | -1.6001 | -1.1714 |
| O | 6.3984  | -2.4964 | 3.3670  | O | -10.2176 | -3.0898 | 2.9359  |
| O | 5.2662  | 5.5911  | 0.7822  | O | 12.0234  | -1.1479 | -0.6235 |
| C | 5.4991  | -2.2254 | 4.4317  | C | -9.2477  | -3.1401 | 3.9714  |
| H | 4.8600  | -3.0885 | 4.6499  | H | -9.0839  | -2.1535 | 4.4194  |
| H | 6.1226  | -2.0128 | 5.2988  | H | -9.6540  | -3.8131 | 4.7250  |
| H | 4.8704  | -1.3540 | 4.2170  | H | -8.2922  | -3.5372 | 3.6109  |
| C | 4.8328  | 6.0613  | 2.0498  | C | 11.8517  | -1.9067 | -1.8114 |
| H | 5.7075  | 6.5171  | 2.5112  | H | 12.8537  | -2.0729 | -2.2038 |
| H | 4.0428  | 6.8144  | 1.9527  | H | 11.3792  | -2.8741 | -1.6075 |
| H | 4.4765  | 5.2415  | 2.6836  | H | 11.2586  | -1.3629 | -2.5553 |
| C | 7.0460  | -3.9231 | -2.3834 | C | -11.7414 | -0.8515 | -2.3740 |
| H | 7.9870  | -4.0551 | -2.9152 | H | -12.6579 | -1.0577 | -2.9248 |
| H | 6.4672  | -4.8520 | -2.4389 | H | -11.6739 | 0.2241  | -2.1759 |
| H | 6.4770  | -3.1127 | -2.8526 | H | -10.8806 | -1.1636 | -2.9760 |
| C | 3.8134  | 2.7798  | -4.2679 | C | 9.4094   | 1.5595  | 3.9983  |
| H | 2.9846  | 3.4066  | -4.6157 | H | 8.8447   | 0.7239  | 4.4266  |
| H | 4.4775  | 2.5672  | -5.1043 | H | 9.9110   | 2.1011  | 4.7988  |
| H | 3.4150  | 1.8377  | -3.8748 | H | 8.7197   | 2.2366  | 3.4819  |

---

Z-2 (MeO groups pointing to front,  
GD3BJ)

E = -2747.52490194

Z-2 (MeO groups pointing back, GD3BJ)

E = -2747.52783874

|   |           |           |           |   |           |           |           |
|---|-----------|-----------|-----------|---|-----------|-----------|-----------|
| C | -4.348415 | 2.086467  | 0.601482  | C | -4.017352 | -2.238545 | -0.414696 |
| O | -7.272056 | 0.116982  | 1.009806  | O | -7.102785 | -0.533810 | -0.836331 |
| C | -3.711715 | 3.324467  | 0.720520  | C | -3.273093 | -3.415583 | -0.528394 |
| C | -6.475153 | 2.995228  | 1.274249  | C | -6.060522 | -3.335575 | -1.059377 |
| C | -5.870804 | 4.241532  | 1.388036  | C | -5.350315 | -4.526295 | -1.160086 |
| C | -4.503340 | 4.401221  | 1.115374  | C | -3.971178 | -4.562724 | -0.901480 |
| C | -5.701435 | 1.906138  | 0.870820  | C | -5.381575 | -2.176950 | -0.679642 |
| C | -6.152445 | 0.507318  | 0.714702  | C | -5.947005 | -0.815237 | -0.557738 |
| C | -5.023785 | -0.348565 | 0.218120  | C | -4.881467 | 0.151983  | -0.128237 |
| C | -5.041592 | -1.663100 | -0.139103 | C | -4.978934 | 1.492097  | 0.102437  |
| C | -6.279190 | -2.558065 | -0.370339 | C | -6.265811 | 2.333239  | 0.246270  |
| C | -1.904113 | -4.307030 | -1.200542 | C | -1.992963 | 4.411699  | 0.844703  |
| C | -3.248829 | -4.598706 | -1.419548 | C | -3.354321 | 4.652949  | 1.028346  |
| C | -4.219019 | -3.684272 | -1.029805 | C | -4.273178 | 3.646655  | 0.755705  |
| C | -5.706587 | -3.770379 | -1.176020 | C | -5.764197 | 3.665199  | 0.896958  |
| C | -2.498908 | -2.218228 | -0.161385 | C | -2.473131 | 2.187127  | 0.063406  |
| C | -1.515066 | -3.122255 | -0.557730 | C | -1.539850 | 3.179306  | 0.352783  |
| C | -6.810569 | -3.045787 | 0.992432  | C | -6.838859 | 2.626510  | -1.154866 |
| C | -3.851123 | -2.470642 | -0.428257 | C | -3.837784 | 2.392902  | 0.298999  |
| C | -7.396402 | -1.898892 | -1.192064 | C | -7.329553 | 1.701152  | 1.155625  |
| H | -1.141440 | -5.003228 | -1.529128 | H | -1.271072 | 5.183665  | 1.085068  |
| H | -5.988215 | -3.688293 | -2.230941 | H | -6.043672 | 3.696575  | 1.955136  |
| H | -6.109192 | -4.719758 | -0.812368 | H | -6.218707 | 4.539089  | 0.422406  |
| H | -7.647010 | -3.733695 | 0.837043  | H | -7.714479 | 3.276232  | -1.065618 |
| H | -6.029693 | -3.575578 | 1.544836  | H | -6.097207 | 3.135444  | -1.776605 |
| H | -7.158997 | -2.202553 | 1.586620  | H | -7.141160 | 1.701948  | -1.643808 |
| H | -7.903964 | -1.118079 | -0.634224 | H | -7.776219 | 0.821177  | 0.702758  |
| H | -6.993587 | -1.473610 | -2.115342 | H | -6.894237 | 1.424746  | 2.119814  |
| H | -8.132145 | -2.661235 | -1.465889 | H | -8.120635 | 2.434072  | 1.341148  |
| H | -7.525873 | 2.845829  | 1.492324  | H | -7.121330 | -3.281716 | -1.273045 |
| H | -6.455033 | 5.100196  | 1.696122  | H | -5.859864 | -5.436637 | -1.451832 |
| H | -4.044103 | 5.378141  | 1.217943  | H | -3.429247 | -5.496492 | -1.002250 |
| S | -3.509969 | 0.617667  | 0.130335  | S | -3.306068 | -0.698906 | 0.029244  |
| H | -3.532353 | -5.528805 | -1.899858 | H | -3.690124 | 5.617809  | 1.392274  |
| H | -2.184915 | -1.336477 | 0.374146  | H | -2.106046 | 1.268794  | -0.364107 |
| C | -2.250540 | 3.365260  | 0.426552  | C | -1.808984 | -3.318678 | -0.259247 |
| C | -1.337834 | 2.991497  | 1.428607  | C | -0.961956 | -2.798905 | -1.255222 |
| C | -1.809406 | 3.579934  | -0.890231 | C | -1.314175 | -3.557716 | 1.033705  |
| C | 0.001478  | 2.812885  | 1.090646  | C | 0.358917  | -2.498143 | -0.931884 |
| C | -0.460720 | 3.399285  | -1.189936 | C | 0.018258  | -3.261587 | 1.315185  |
| C | 0.458740  | 2.993391  | -0.217999 | C | 0.869912  | -2.709099 | 0.352603  |
| H | 0.693659  | 2.474051  | 1.852134  | H | 0.990692  | -2.045944 | -1.686932 |
| H | -0.120521 | 3.571802  | -2.204228 | H | 0.401061  | -3.468721 | 2.307561  |
| C | -0.081708 | -2.802406 | -0.298434 | C | -0.095733 | 2.869539  | 0.141340  |
| C | 0.508773  | -1.672533 | -0.898783 | C | 0.519718  | 1.869311  | 0.919787  |
| C | 0.676897  | -3.607334 | 0.575071  | C | 0.631392  | 3.509495  | -0.880402 |
| C | 1.844290  | -1.375584 | -0.625991 | C | 1.850101  | 1.536387  | 0.671464  |
| C | 2.006627  | -3.277172 | 0.823956  | C | 1.955656  | 3.138275  | -1.109966 |
| C | 2.611819  | -2.165971 | 0.229631  | C | 2.583474  | 2.154943  | -0.341506 |
| H | 2.281246  | -0.491040 | -1.071958 | H | 2.312877  | 0.744613  | 1.247715  |
| H | 2.588935  | -3.911027 | 1.482855  | H | 2.516350  | 3.635765  | -1.893737 |
| C | 4.033583  | -1.840892 | 0.494427  | C | 3.989107  | 1.756296  | -0.589010 |
| C | 4.585374  | -2.053569 | 1.759836  | C | 4.425229  | 1.490174  | -1.891994 |
| C | 4.839261  | -1.326906 | -0.526918 | C | 4.864350  | 1.613630  | 0.488991  |
| C | 5.927329  | -1.767494 | 1.999009  | C | 5.741162  | 1.069723  | -2.100265 |
| H | 3.984192  | -2.419327 | 2.580844  | H | 3.724544  | 1.577933  | -2.709206 |

---

|   |           |           |           |   |           |           |           |
|---|-----------|-----------|-----------|---|-----------|-----------|-----------|
| C | 6.177050  | -1.043031 | -0.278366 | C | 6.178672  | 1.198645  | 0.261808  |
| H | 4.441589  | -1.163727 | -1.518481 | H | 4.509070  | 1.820893  | 1.486966  |
| C | 6.742870  | -1.261311 | 0.980902  | C | 6.618219  | 0.927458  | -1.030076 |
| H | 7.781988  | -1.042128 | 1.165281  | H | 7.629708  | 0.585176  | -1.197842 |
| C | 1.870544  | 2.708252  | -0.567403 | C | 2.266440  | -2.338931 | 0.685514  |
| C | 2.183408  | 2.133538  | -1.802683 | C | 2.579553  | -1.867638 | 1.967262  |
| C | 2.895953  | 2.971590  | 0.342680  | C | 3.271455  | -2.440941 | -0.281091 |
| C | 3.502055  | 1.805599  | -2.108693 | C | 3.897306  | -1.519451 | 2.271144  |
| H | 1.413713  | 1.893950  | -2.522401 | H | 1.789671  | -1.743543 | 2.692073  |
| C | 4.213815  | 2.647208  | 0.025683  | C | 4.584678  | -2.085136 | 0.039320  |
| H | 2.698082  | 3.441296  | 1.296300  | H | 3.029961  | -2.828215 | -1.259159 |
| C | 4.533988  | 2.056817  | -1.200125 | C | 4.903109  | -1.638200 | 1.318431  |
| H | 5.543967  | 1.754952  | -1.423729 | H | 5.919407  | -1.351647 | 1.547881  |
| C | -1.807303 | 2.724780  | 2.836888  | C | -1.483452 | -2.516821 | -2.642178 |
| H | -2.351814 | 3.579569  | 3.245609  | H | -1.979335 | -3.392387 | -3.067803 |
| H | -2.487701 | 1.868669  | 2.867755  | H | -2.218787 | -1.707089 | -2.628388 |
| H | -0.962687 | 2.509461  | 3.492651  | H | -0.671153 | -2.223069 | -3.308450 |
| C | -2.788187 | 3.949989  | -1.976373 | C | -2.221797 | -4.086696 | 2.116009  |
| H | -3.526868 | 3.155962  | -2.121720 | H | -3.054250 | -3.400143 | 2.296375  |
| H | -3.342825 | 4.857925  | -1.726636 | H | -2.659399 | -5.049478 | 1.840247  |
| H | -2.273509 | 4.112442  | -2.924363 | H | -1.677020 | -4.215344 | 3.052350  |
| C | -0.251889 | -0.760130 | -1.833000 | C | -0.222461 | 1.123166  | 2.004158  |
| H | -1.028391 | -1.292333 | -2.382700 | H | -0.926558 | 1.765950  | 2.534565  |
| H | -0.737832 | 0.055062  | -1.288151 | H | -0.793928 | 0.285381  | 1.593924  |
| H | 0.433577  | -0.306355 | -2.549940 | H | 0.483886  | 0.709735  | 2.726313  |
| C | 0.074704  | -4.808361 | 1.266335  | C | -0.005883 | 4.568681  | -1.748078 |
| H | -0.921241 | -4.586954 | 1.655828  | H | -0.985275 | 4.249009  | -2.111915 |
| H | -0.031341 | -5.659671 | 0.587602  | H | -0.160966 | 5.502828  | -1.200577 |
| H | 0.706708  | -5.126613 | 2.097109  | H | 0.626301  | 4.791168  | -2.609216 |
| O | 3.691649  | 1.190349  | -3.312472 | O | 4.288697  | -1.004949 | 3.478227  |
| O | 6.884404  | -0.519974 | -1.332714 | O | 7.097617  | 1.009045  | 1.250329  |
| O | 6.366834  | -2.005207 | 3.267711  | O | 6.252883  | 0.740190  | -3.326005 |
| O | 5.137671  | 2.946730  | 0.983088  | O | 5.623452  | -2.149739 | -0.834703 |
| C | 7.714769  | -1.700570 | 3.584398  | C | 5.426503  | 0.923012  | -4.463543 |
| H | 7.929834  | -0.635308 | 3.441660  | H | 5.109424  | 1.966484  | -4.566205 |
| H | 7.838412  | -1.953486 | 4.635771  | H | 6.034186  | 0.643638  | -5.322594 |
| H | 8.413818  | -2.295894 | 2.985894  | H | 4.538593  | 0.281070  | -4.425368 |
| C | 6.491557  | 2.599061  | 0.742299  | C | 5.330840  | -2.346941 | -2.210221 |
| H | 7.043078  | 2.930666  | 1.620734  | H | 6.265765  | -2.180643 | -2.740394 |
| H | 6.605883  | 1.517724  | 0.627600  | H | 4.971432  | -3.364095 | -2.401839 |
| H | 6.885681  | 3.108368  | -0.144785 | H | 4.588221  | -1.622119 | -2.557834 |
| C | 8.291328  | -0.386122 | -1.206120 | C | 6.736344  | 1.370473  | 2.580309  |
| H | 8.646538  | -0.031098 | -2.172129 | H | 7.625008  | 1.190709  | 3.183075  |
| H | 8.561343  | 0.344872  | -0.435722 | H | 6.466060  | 2.430313  | 2.639762  |
| H | 8.763460  | -1.346553 | -0.974927 | H | 5.913499  | 0.755087  | 2.954278  |
| C | 5.025606  | 1.025301  | -3.784318 | C | 3.307616  | -0.855072 | 4.493050  |
| H | 5.602249  | 0.350493  | -3.147213 | H | 2.855331  | -1.816791 | 4.757058  |
| H | 4.932690  | 0.597006  | -4.781002 | H | 3.832285  | -0.454137 | 5.358512  |
| H | 5.537683  | 1.991979  | -3.850492 | H | 2.520597  | -0.155469 | 4.190734  |

---

---

| <i>E-110</i> complex A |         |         | <i>E-110</i> complex B |   |         |         |         |
|------------------------|---------|---------|------------------------|---|---------|---------|---------|
| E = -4085.49401675     |         |         | E = -4085.49036644     |   |         |         |         |
| C                      | 6.2956  | -2.8719 | 0.3347                 | C | -6.0565 | -2.6720 | -1.5608 |
| O                      | 3.6462  | -0.5176 | 0.2453                 | O | -3.8967 | -0.7515 | 0.4857  |
| C                      | 6.6992  | -4.1833 | 0.5648                 | C | -6.2910 | -3.8385 | -2.2806 |
| C                      | 3.9640  | -3.4301 | 0.7378                 | C | -3.7428 | -3.2997 | -1.1346 |
| C                      | 4.3748  | -4.7428 | 0.9766                 | C | -3.9888 | -4.4695 | -1.8586 |
| C                      | 5.7204  | -5.1120 | 0.8948                 | C | -5.2404 | -4.7371 | -2.4169 |
| C                      | 4.9557  | -2.4839 | 0.4261                 | C | -4.8110 | -2.3945 | -0.9828 |
| C                      | 4.7467  | -1.0490 | 0.1726                 | C | -4.8021 | -1.1181 | -0.2437 |
| C                      | 6.0362  | -0.3561 | -0.1466                | C | -6.0964 | -0.3826 | -0.4152 |
| C                      | 6.2703  | 0.9597  | -0.4393                | C | -6.4051 | 0.8574  | 0.0525  |
| C                      | 7.6894  | 1.5261  | -0.7302                | C | -7.8263 | 1.4585  | 0.1208  |
| C                      | 3.9964  | 4.5110  | -1.0293                | C | -4.2007 | 4.1957  | 1.4543  |
| C                      | 5.3864  | 4.4883  | -0.9802                | C | -5.5760 | 4.0653  | 1.6287  |
| C                      | 6.0389  | 3.2827  | -0.7702                | C | -6.2148 | 2.9266  | 1.1556  |
| C                      | 7.5070  | 3.0622  | -0.6295                | C | -7.6731 | 2.5879  | 1.1834  |
| C                      | 3.9233  | 2.1162  | -0.7069                | C | -4.1145 | 2.0709  | 0.3117  |
| C                      | 3.2609  | 3.3280  | -0.8893                | C | -3.4641 | 3.2090  | 0.7821  |
| C                      | 8.8181  | 1.1131  | 0.2300                 | C | -8.1541 | 2.0841  | -1.2517 |
| C                      | 5.3247  | 2.0761  | -0.6244                | C | -5.4866 | 1.9047  | 0.5232  |
| C                      | 8.0491  | 1.1513  | -2.1849                | C | -8.9422 | 0.4996  | 0.5549  |
| H                      | 3.4698  | 5.4475  | -1.1746                | H | -3.6898 | 5.0805  | 1.8165  |
| H                      | 8.0979  | 3.5897  | -1.3830                | H | -7.9577 | 2.2074  | 2.1707  |
| H                      | 7.8440  | 3.4185  | 0.3502                 | H | -8.3195 | 3.4418  | 0.9646  |
| H                      | 9.6431  | 1.8209  | 0.1113                 | H | -9.1440 | 2.5480  | -1.2238 |
| H                      | 8.4880  | 1.1502  | 1.2705                 | H | -7.4207 | 2.8493  | -1.5152 |
| H                      | 9.2203  | 0.1223  | 0.0330                 | H | -8.1530 | 1.3257  | -2.0373 |
| H                      | 8.0819  | 0.0690  | -2.3192                | H | -9.2513 | -0.1837 | -0.2344 |
| H                      | 7.3143  | 1.5604  | -2.8821                | H | -8.6392 | -0.0931 | 1.4209  |
| H                      | 9.0313  | 1.5588  | -2.4399                | H | -9.8209 | 1.0876  | 0.8346  |
| H                      | 3.6247  | -5.4865 | 1.2166                 | H | -3.1829 | -5.1829 | -1.9804 |
| H                      | 6.0031  | -6.1411 | 1.0848                 | H | -5.3931 | -5.6589 | -2.9662 |
| S                      | 7.3798  | -1.5520 | -0.0783                | S | -7.2718 | -1.4239 | -1.2768 |
| H                      | 5.9551  | 5.4047  | -1.0931                | H | -6.1416 | 4.8504  | 2.1181  |
| H                      | 3.3515  | 1.2133  | -0.6069                | H | -3.5540 | 1.3303  | -0.2297 |
| C                      | 1.7695  | 3.3579  | -0.8823                | C | -1.9944 | 3.3515  | 0.5623  |
| C                      | 1.0416  | 3.0387  | -2.0386                | C | -1.0980 | 3.1541  | 1.6289  |
| C                      | 1.0967  | 3.6900  | 0.3071                 | C | -1.4952 | 3.6334  | -0.7213 |
| C                      | -0.3508 | 3.0454  | -1.9855                | C | 0.2721  | 3.1852  | 1.3824  |
| C                      | -0.2938 | 3.6804  | 0.3237                 | C | -0.1172 | 3.6832  | -0.9210 |
| C                      | -1.0440 | 3.3552  | -0.8109                | C | 0.7956  | 3.4273  | 0.1070  |
| H                      | -0.9003 | 2.8192  | -2.8905                | H | 0.9358  | 2.9697  | 2.2089  |
| H                      | -0.7969 | 3.8949  | 1.2573                 | H | 0.2394  | 3.9034  | -1.9177 |
| C                      | -2.5241 | 3.3043  | -0.7496                | C | 2.2569  | 3.3512  | -0.1578 |
| C                      | -3.2258 | 3.9895  | 0.2452                 | C | 2.7485  | 3.2881  | -1.4666 |
| C                      | -3.2433 | 2.5213  | -1.6619                | C | 3.1731  | 3.2809  | 0.8979  |
| C                      | -4.6129 | 3.8831  | 0.3327                 | C | 4.1165  | 3.1757  | -1.7094 |
| H                      | -2.7261 | 4.6191  | 0.9667                 | H | 2.0930  | 3.2875  | -2.3240 |
| C                      | -4.6297 | 2.4248  | -1.5766                | C | 4.5380  | 3.1599  | 0.6494  |
| H                      | -2.7461 | 1.9468  | -2.4292                | H | 2.8650  | 3.3328  | 1.9315  |
| C                      | -5.3335 | 3.1021  | -0.5786                | C | 5.0331  | 3.1159  | -0.6559 |
| H                      | -6.4034 | 3.0058  | -0.4982                | H | 6.0893  | 3.0094  | -0.8413 |
| C                      | 1.7489  | 2.6820  | -3.3214                | C | -1.5982 | 2.8663  | 3.0226  |
| H                      | 2.5258  | 3.4107  | -3.5646                | H | -2.0046 | 3.7674  | 3.4911  |
| H                      | 2.2308  | 1.7047  | -3.2416                | H | -2.3933 | 2.1200  | 3.0169  |
| H                      | 1.0438  | 2.6375  | -4.1529                | H | -0.7866 | 2.5042  | 3.6568  |
| C                      | 1.8583  | 4.0302  | 1.5641                 | C | -2.4210 | 3.8436  | -1.8944 |
| H                      | 2.5951  | 3.2622  | 1.8095                 | H | -2.7831 | 2.8861  | -2.2804 |
| H                      | 2.4102  | 4.9677  | 1.4528                 | H | -3.2960 | 4.4333  | -1.6155 |

---

---

|   |         |         |         |   |         |         |         |
|---|---------|---------|---------|---|---------|---------|---------|
| H | 1.1799  | 4.1406  | 2.4111  | H | -1.9006 | 4.3518  | -2.7076 |
| O | -5.2142 | 1.5866  | -2.4788 | O | 5.3241  | 3.0484  | 1.7568  |
| O | -5.1897 | 4.5686  | 1.3534  | O | 4.4735  | 3.0797  | -3.0209 |
| C | -6.5777 | 4.3843  | 1.5975  | C | 5.8574  | 3.0292  | -3.3444 |
| H | -6.8128 | 3.3309  | 1.7806  | H | 6.3562  | 2.1825  | -2.8635 |
| H | -6.7986 | 4.9629  | 2.4918  | H | 5.9065  | 2.9055  | -4.4238 |
| H | -7.1841 | 4.7562  | 0.7644  | H | 6.3639  | 3.9556  | -3.0544 |
| C | -6.6351 | 1.4531  | -2.4681 | C | 6.7370  | 3.1579  | 1.6029  |
| H | -6.8663 | 0.7292  | -3.2456 | H | 7.1428  | 3.1535  | 2.6122  |
| H | -6.9909 | 1.0713  | -1.5076 | H | 7.1468  | 2.3065  | 1.0530  |
| H | -7.1172 | 2.4101  | -2.6924 | H | 7.0016  | 4.0947  | 1.1026  |
| C | 2.4951  | -3.1546 | 0.7740  | C | -2.3550 | -3.1121 | -0.6061 |
| C | 1.7423  | -3.3535 | -0.3946 | C | -2.0514 | -3.3667 | 0.7421  |
| C | 1.8526  | -2.8488 | 1.9835  | C | -1.3157 | -2.8333 | -1.5132 |
| C | 0.3516  | -3.3105 | -0.3177 | C | -0.7162 | -3.3885 | 1.1455  |
| C | 2.4237  | -3.6023 | -1.7163 | C | -3.1380 | -3.6112 | 1.7556  |
| C | 0.4600  | -2.8245 | 2.0230  | C | 0.0034  | -2.8445 | -1.0653 |
| C | 2.6544  | -2.5384 | 3.2208  | C | -1.6047 | -2.5194 | -2.9619 |
| C | -0.3187 | -3.0752 | 0.8886  | C | 0.3401  | -3.1421 | 0.2606  |
| H | -0.2125 | -3.4767 | -1.2255 | H | -0.5076 | -3.6283 | 2.1798  |
| H | 1.6957  | -3.7770 | -2.5068 | H | -3.5976 | -2.6605 | 2.0378  |
| H | 3.0258  | -2.7364 | -2.0068 | H | -3.9241 | -4.2561 | 1.3575  |
| H | 3.0981  | -4.4605 | -1.6634 | H | -2.7337 | -4.0731 | 2.6573  |
| H | -0.0195 | -2.6284 | 2.9736  | H | 0.7805  | -2.6074 | -1.7802 |
| H | 2.0034  | -2.3814 | 4.0816  | H | -0.7133 | -2.1260 | -3.4544 |
| H | 3.3566  | -3.3409 | 3.4602  | H | -1.9225 | -3.4095 | -3.5111 |
| H | 3.2414  | -1.6269 | 3.0763  | H | -2.4003 | -1.7784 | -3.0556 |
| C | -1.8019 | -3.0831 | 0.9536  | C | 1.7571  | -3.1821 | 0.7108  |
| C | -2.4780 | -2.4406 | 2.0000  | C | 2.0816  | -3.1803 | 2.0715  |
| C | -2.5559 | -3.7261 | -0.0311 | C | 2.8022  | -3.1926 | -0.2213 |
| C | -3.8683 | -2.4668 | 2.0663  | C | 3.4146  | -3.2119 | 2.4832  |
| H | -1.9497 | -1.9070 | 2.7757  | H | 1.3281  | -3.1249 | 2.8436  |
| C | -3.9499 | -3.7171 | 0.0205  | C | 4.1324  | -3.2177 | 0.1945  |
| H | -2.0910 | -4.2564 | -0.8494 | H | 2.6205  | -3.1985 | -1.2857 |
| C | -4.6258 | -3.0979 | 1.0751  | C | 4.4592  | -3.2424 | 1.5518  |
| O | -4.4210 | -1.7905 | 3.1128  | O | 3.6076  | -3.1812 | 3.8273  |
| O | -4.5777 | -4.3163 | -1.0275 | O | 5.0544  | -3.1775 | -0.8067 |
| H | -5.7029 | -3.0787 | 1.1103  | H | 5.4881  | -3.2539 | 1.8719  |
| C | -5.7870 | -2.0413 | 3.4412  | C | 4.9381  | -3.1357 | 4.3255  |
| C | -5.9967 | -4.4503 | -0.9862 | C | 6.4376  | -3.2822 | -0.4739 |
| H | -5.9556 | -3.1108 | 3.5999  | H | 5.4725  | -2.2538 | 3.9588  |
| H | -5.9679 | -1.4988 | 4.3669  | H | 4.8450  | -3.0712 | 5.4071  |
| H | -6.4618 | -1.6667 | 2.6676  | H | 5.4946  | -4.0402 | 4.0576  |
| H | -6.2662 | -4.9772 | -1.8988 | H | 6.9711  | -3.2151 | -1.4192 |
| H | -6.3093 | -5.0343 | -0.1148 | H | 6.7585  | -2.4624 | 0.1739  |
| H | -6.4872 | -3.4736 | -0.9834 | H | 6.6511  | -4.2421 | 0.0074  |
| H | 7.7412  | -4.4691 | 0.4923  | H | -7.2613 | -4.0408 | -2.7171 |
| C | -2.4162 | -1.5564 | -2.9090 | C | -0.9954 | 0.0462  | 0.6861  |
| C | -3.7062 | -1.4469 | -2.4310 | C | -0.3655 | -0.2215 | 1.8866  |
| C | -4.0044 | -0.8206 | -1.2277 | C | 1.0118  | -0.1772 | 2.0362  |
| C | -2.9563 | -0.3024 | -0.4888 | C | 1.7732  | 0.0583  | 0.9031  |
| C | -1.6032 | -0.4101 | -0.9214 | C | 1.1848  | 0.2142  | -0.3823 |
| C | -1.3735 | -1.0192 | -2.1580 | C | -0.2125 | 0.2822  | -0.4399 |
| H | -2.2170 | -2.0525 | -3.8459 | H | -2.0714 | -0.0063 | 0.6148  |
| H | -5.0302 | -0.7604 | -0.9125 | H | 1.4453  | -0.3796 | 3.0018  |
| C | -1.5885 | 0.6202  | 1.1805  | C | 3.5008  | -0.0064 | -0.6739 |
| C | -1.0514 | 1.1153  | 2.3605  | C | 4.6995  | -0.1671 | -1.3491 |
| C | 0.3320  | 1.0718  | 2.4970  | C | 4.6546  | -0.2235 | -2.7356 |
| C | 1.1723  | 0.5754  | 1.5127  | C | 3.4702  | -0.1154 | -3.4507 |
| C | 0.6338  | 0.1125  | 0.3178  | C | 2.2699  | 0.0645  | -2.7706 |
| C | -0.7436 | 0.1296  | 0.1451  | C | 2.2740  | 0.1345  | -1.3797 |
| H | -1.6515 | 1.5088  | 3.1656  | H | 5.6478  | -0.2682 | -0.8511 |

---

---

|   |         |         |         |   |         |         |         |
|---|---------|---------|---------|---|---------|---------|---------|
| H | 2.2380  | 0.5404  | 1.6694  | H | 3.4987  | -0.1638 | -4.5293 |
| H | 1.3011  | -0.2793 | -0.4278 | H | 1.3566  | 0.1700  | -3.3286 |
| C | -2.9879 | 0.4026  | 0.8046  | C | 3.2333  | 0.0186  | 0.7653  |
| C | -4.1001 | 0.7810  | 1.5022  | C | 4.1444  | 0.0134  | 1.7837  |
| C | -4.0525 | 1.5322  | 2.7097  | C | 5.5444  | -0.0870 | 1.5630  |
| C | -5.4223 | 0.4312  | 1.1129  | C | 3.7906  | 0.1489  | 3.1549  |
| N | -4.0667 | 2.1457  | 3.6885  | N | 6.6850  | -0.1983 | 1.4109  |
| N | -6.5099 | 0.1362  | 0.8541  | N | 3.5421  | 0.2691  | 4.2768  |
| N | -4.8078 | -2.0053 | -3.2279 | N | -1.1801 | -0.6235 | 3.0455  |
| O | -5.9484 | -1.8385 | -2.8058 | O | -0.6000 | -1.2068 | 3.9544  |
| O | -4.5259 | -2.5948 | -4.2586 | O | -2.3741 | -0.3733 | 3.0197  |
| N | -0.0399 | -1.1338 | -2.7718 | N | -0.9465 | 0.5904  | -1.6760 |
| O | 0.1446  | -2.0698 | -3.5384 | O | -2.1474 | 0.3598  | -1.7019 |
| O | 0.7892  | -0.2753 | -2.5093 | O | -0.3311 | 1.0965  | -2.6047 |
| N | 0.9317  | 1.5786  | 3.7439  | N | 5.9165  | -0.4048 | -3.4683 |
| O | 2.1097  | 1.3180  | 3.9541  | O | 5.8761  | -0.3750 | -4.6906 |
| O | 0.2170  | 2.2356  | 4.4895  | O | 6.9396  | -0.5633 | -2.8090 |

---

---

*E-110* complex C  
E = -4085.48791674

*E-110* complex D  
E = -4085.48481919

|   |         |         |         |   |         |         |         |
|---|---------|---------|---------|---|---------|---------|---------|
| C | 6.3300  | -2.7243 | 0.3856  | C | 6.6282  | -2.3531 | -0.1245 |
| O | 3.5965  | -0.4630 | 0.2870  | O | 3.8696  | -0.2489 | -0.8702 |
| C | 6.7854  | -4.0142 | 0.6401  | C | 7.1510  | -3.6367 | -0.0092 |
| C | 4.0302  | -3.3555 | 0.8460  | C | 4.3997  | -3.2111 | -0.5769 |
| C | 4.4916  | -4.6470 | 1.1062  | C | 4.9315  | -4.4973 | -0.4611 |
| C | 5.8478  | -4.9700 | 1.0086  | C | 6.2840  | -4.7075 | -0.1857 |
| C | 4.9789  | -2.3809 | 0.4919  | C | 5.2776  | -2.1225 | -0.4092 |
| C | 4.7125  | -0.9608 | 0.2030  | C | 4.9486  | -0.6842 | -0.5050 |
| C | 5.9722  | -0.2374 | -0.1699 | C | 6.1419  | 0.1660  | -0.1724 |
| C | 6.1588  | 1.0692  | -0.5296 | C | 6.2131  | 1.5233  | -0.0739 |
| C | 7.5551  | 1.6631  | -0.8740 | C | 7.5368  | 2.3139  | 0.0877  |
| C | 3.7653  | 4.5030  | -1.2995 | C | 3.4841  | 4.7504  | 0.3401  |
| C | 5.1553  | 4.5280  | -1.2697 | C | 4.8450  | 4.9272  | 0.1114  |
| C | 5.8482  | 3.3597  | -0.9915 | C | 5.6563  | 3.8125  | -0.0469 |
| C | 7.3239  | 3.1954  | -0.8570 | C | 7.1323  | 3.7694  | -0.2763 |
| C | 3.7719  | 2.1333  | -0.8150 | C | 3.7536  | 2.3512  | 0.2564  |
| C | 3.0701  | 3.3097  | -1.0675 | C | 2.9325  | 3.4639  | 0.4209  |
| C | 8.7085  | 1.3415  | 0.0922  | C | 7.9512  | 2.2603  | 1.5739  |
| C | 5.1753  | 2.1429  | -0.7586 | C | 5.1233  | 2.5117  | 0.0120  |
| C | 7.9083  | 1.2212  | -2.3114 | C | 8.7004  | 1.8806  | -0.8161 |
| H | 3.2061  | 5.4103  | -1.4984 | H | 2.8387  | 5.6114  | 0.4724  |
| H | 7.8896  | 3.6986  | -1.6456 | H | 7.3555  | 3.9661  | -1.3311 |
| H | 7.6582  | 3.6170  | 0.0974  | H | 7.6852  | 4.5042  | 0.3146  |
| H | 9.5080  | 2.0681  | -0.0769 | H | 8.8688  | 2.8357  | 1.7255  |
| H | 8.3893  | 1.4265  | 1.1333  | H | 7.1691  | 2.6836  | 2.2084  |
| H | 9.1413  | 0.3549  | -0.0542 | H | 8.1330  | 1.2339  | 1.8967  |
| H | 7.9744  | 0.1351  | -2.3889 | H | 9.2016  | 0.9774  | -0.4743 |
| H | 7.1519  | 1.5694  | -3.0186 | H | 8.3627  | 1.7167  | -1.8420 |
| H | 8.8734  | 1.6454  | -2.6017 | H | 9.4481  | 2.6788  | -0.8274 |
| H | 3.7728  | -5.4104 | 1.3784  | H | 4.2713  | -5.3454 | -0.5948 |
| H | 6.1711  | -5.9834 | 1.2170  | H | 6.6621  | -5.7203 | -0.1076 |
| S | 7.3594  | -1.3804 | -0.0804 | S | 7.5803  | -0.8816 | 0.0544  |
| H | 5.6927  | 5.4523  | -1.4507 | H | 5.2681  | 5.9246  | 0.0673  |
| H | 3.2312  | 1.2219  | -0.6404 | H | 3.3328  | 1.3664  | 0.3120  |
| C | 1.5795  | 3.3060  | -1.0354 | C | 1.4723  | 3.2910  | 0.6786  |
| C | 0.8368  | 2.9169  | -2.1604 | C | 0.5463  | 3.5531  | -0.3498 |
| C | 0.9216  | 3.6939  | 0.1447  | C | 1.0167  | 2.8906  | 1.9485  |
| C | -0.5543 | 2.9237  | -2.0884 | C | -0.8125 | 3.3946  | -0.0928 |
| C | -0.4680 | 3.6750  | 0.1829  | C | -0.3528 | 2.7389  | 2.1637  |
| C | -1.2352 | 3.2920  | -0.9227 | C | -1.2919 | 2.9807  | 1.1554  |
| H | -1.1116 | 2.6505  | -2.9753 | H | -1.5054 | 3.5768  | -0.9031 |
| H | -0.9544 | 3.9296  | 1.1150  | H | -0.6886 | 2.4543  | 3.1531  |
| C | -2.7144 | 3.2404  | -0.8382 | C | -2.7445 | 2.7819  | 1.3806  |
| C | -3.3972 | 3.9420  | 0.1646  | C | -3.2007 | 1.9292  | 2.3929  |
| C | -3.4445 | 2.4504  | -1.7371 | C | -3.6839 | 3.4023  | 0.5511  |
| C | -4.7844 | 3.8301  | 0.2787  | C | -4.5647 | 1.6988  | 2.5612  |
| H | -2.8506 | 4.5797  | 0.8400  | H | -2.5176 | 1.4003  | 3.0407  |
| C | -4.8318 | 2.3568  | -1.6216 | C | -5.0456 | 3.1620  | 0.7179  |
| H | -2.9280 | 1.8796  | -2.4919 | H | -3.3889 | 4.0907  | -0.2273 |
| C | -5.5057 | 3.0294  | -0.6098 | C | -5.5050 | 2.3061  | 1.7243  |
| H | -6.5777 | 2.9340  | -0.5106 | H | -6.5583 | 2.1123  | 1.8423  |
| C | 1.5275  | 2.4845  | -3.4287 | C | 1.0011  | 3.9816  | -1.7215 |
| H | 2.3044  | 3.1938  | -3.7231 | H | 1.4174  | 4.9928  | -1.7026 |
| H | 2.0067  | 1.5113  | -3.2971 | H | 1.7786  | 3.3179  | -2.1032 |
| H | 0.8126  | 2.3937  | -4.2481 | H | 0.1686  | 3.9696  | -2.4262 |
| C | 1.7002  | 4.1025  | 1.3706  | C | 1.9863  | 2.6414  | 3.0760  |
| H | 2.4362  | 3.3454  | 1.6503  | H | 2.5619  | 1.7284  | 2.9064  |
| H | 2.2558  | 5.0282  | 1.1980  | H | 2.7003  | 3.4627  | 3.1706  |

---



---

|   |         |         |         |   |         |         |         |
|---|---------|---------|---------|---|---------|---------|---------|
| H | 1.0339  | 4.2649  | 2.2187  | H | 1.4560  | 2.5314  | 4.0233  |
| O | -5.5990 | 1.5616  | -2.4229 | O | -5.8635 | 3.7869  | -0.1710 |
| O | -5.5241 | 4.4567  | 1.2270  | O | -4.8948 | 0.8226  | 3.5510  |
| C | -4.8625 | 5.3211  | 2.1473  | C | -6.2629 | 0.4687  | 3.7124  |
| H | -4.3680 | 6.1470  | 1.6254  | H | -6.6627 | 0.0032  | 2.8055  |
| H | -5.6463 | 5.7150  | 2.7907  | H | -6.2869 | -0.2491 | 4.5301  |
| H | -4.1409 | 4.7716  | 2.7564  | H | -6.8712 | 1.3391  | 3.9795  |
| C | -5.1052 | 1.2323  | -3.7153 | C | -7.2729 | 3.6622  | -0.0049 |
| H | -5.9137 | 0.7006  | -4.2124 | H | -7.7148 | 4.2629  | -0.7973 |
| H | -4.8483 | 2.1362  | -4.2766 | H | -7.5935 | 2.6233  | -0.1140 |
| H | -4.2290 | 0.5790  | -3.6662 | H | -7.5903 | 4.0532  | 0.9676  |
| C | 2.5558  | -3.1277 | 0.9130  | C | 2.9386  | -3.0840 | -0.8560 |
| C | 1.7802  | -3.3756 | -0.2300 | C | 2.4801  | -2.7438 | -2.1382 |
| C | 1.9378  | -2.8097 | 2.1319  | C | 2.0186  | -3.3983 | 0.1620  |
| C | 0.3912  | -3.3626 | -0.1186 | C | 1.1093  | -2.7281 | -2.3852 |
| C | 2.4355  | -3.6422 | -1.5615 | C | 3.4311  | -2.3568 | -3.2387 |
| C | 0.5470  | -2.8187 | 2.2069  | C | 0.6560  | -3.3533 | -0.1210 |
| C | 2.7633  | -2.4478 | 3.3391  | C | 2.4781  | -3.7311 | 1.5599  |
| C | -0.2539 | -3.1112 | 1.0980  | C | 0.1722  | -3.0175 | -1.3907 |
| H | -0.1915 | -3.5573 | -1.0088 | H | 0.7755  | -2.4827 | -3.3851 |
| H | 1.6919  | -3.7809 | -2.3447 | H | 3.6943  | -1.3006 | -3.1346 |
| H | 3.0720  | -2.8021 | -1.8526 | H | 4.3542  | -2.9380 | -3.2055 |
| H | 3.0735  | -4.5292 | -1.5218 | H | 2.9696  | -2.4941 | -4.2179 |
| H | 0.0868  | -2.6157 | 3.1657  | H | -0.0385 | -3.5578 | 0.6832  |
| H | 2.1307  | -2.2820 | 4.2119  | H | 1.6353  | -3.7612 | 2.2516  |
| H | 3.4905  | -3.2267 | 3.5817  | H | 2.9819  | -4.7006 | 1.5982  |
| H | 3.3241  | -1.5273 | 3.1536  | H | 3.1828  | -2.9830 | 1.9276  |
| C | -1.7340 | -3.1203 | 1.1920  | C | -1.2843 | -2.9288 | -1.6599 |
| C | -2.3840 | -2.4100 | 2.2092  | C | -2.2056 | -3.5874 | -0.8407 |
| C | -2.5002 | -3.8096 | 0.2438  | C | -1.7658 | -2.1610 | -2.7280 |
| C | -3.7781 | -2.3895 | 2.2692  | C | -3.5733 | -3.4914 | -1.0886 |
| H | -1.8039 | -1.8452 | 2.9205  | H | -1.8896 | -4.2097 | -0.0160 |
| C | -3.8940 | -3.7523 | 0.2937  | C | -3.1333 | -2.0705 | -2.9744 |
| H | -2.0085 | -4.3881 | -0.5218 | H | -1.1011 | -1.5993 | -3.3681 |
| C | -4.5412 | -3.0426 | 1.3033  | C | -4.0567 | -2.7368 | -2.1628 |
| O | -4.4793 | -1.7044 | 3.2151  | O | -4.3739 | -4.1686 | -0.2208 |
| O | -4.7057 | -4.3352 | -0.6324 | O | -3.4896 | -1.2594 | -4.0130 |
| H | -5.6209 | -2.9987 | 1.3376  | H | -5.1154 | -2.6627 | -2.3514 |
| C | -3.7793 | -1.2325 | 4.3628  | C | -5.7677 | -4.2431 | -0.4966 |
| C | -4.1328 | -5.2698 | -1.5429 | C | -4.8578 | -1.1987 | -4.3915 |
| H | -3.0402 | -0.4698 | 4.1037  | H | -5.9519 | -4.6846 | -1.4817 |
| H | -4.5335 | -0.7839 | 5.0050  | H | -6.1849 | -4.8908 | 0.2722  |
| H | -3.2854 | -2.0581 | 4.8845  | H | -6.2399 | -3.2591 | -0.4315 |
| H | -4.9618 | -5.6434 | -2.1392 | H | -4.9057 | -0.4929 | -5.2172 |
| H | -3.4085 | -4.7924 | -2.2090 | H | -5.2218 | -2.1797 | -4.7138 |
| H | -3.6544 | -6.0950 | -1.0063 | H | -5.4865 | -0.8296 | -3.5743 |
| H | 7.8360  | -4.2630 | 0.5555  | H | 8.2001  | -3.7950 | 0.2083  |
| C | -2.6585 | -1.8690 | -2.7647 | C | -4.4081 | 1.0101  | -1.8164 |
| C | -3.9492 | -1.7122 | -2.2954 | C | -3.1982 | 1.3772  | -2.3638 |
| C | -4.2480 | -0.9686 | -1.1605 | C | -1.9891 | 1.0084  | -1.7990 |
| C | -3.1908 | -0.4035 | -0.4644 | C | -2.0188 | 0.2400  | -0.6459 |
| C | -1.8408 | -0.5508 | -0.8919 | C | -3.2373 | -0.1890 | -0.0437 |
| C | -1.6150 | -1.2572 | -2.0774 | C | -4.4278 | 0.2143  | -0.6759 |
| H | -2.4634 | -2.4444 | -3.6562 | H | -5.3314 | 1.3294  | -2.2703 |
| H | -5.2779 | -0.8577 | -0.8647 | H | -1.0713 | 1.3240  | -2.2655 |
| C | -1.8056 | 0.6401  | 1.1210  | C | -1.4686 | -0.8669 | 1.3437  |
| C | -1.2499 | 1.2165  | 2.2544  | C | -0.8408 | -1.4773 | 2.4198  |
| C | 0.1337  | 1.1639  | 2.3877  | C | -1.6377 | -2.1587 | 3.3320  |
| C | 0.9644  | 0.5867  | 1.4392  | C | -3.0158 | -2.2411 | 3.2023  |
| C | 0.4097  | 0.0464  | 0.2849  | C | -3.6430 | -1.6311 | 2.1213  |
| C | -0.9705 | 0.0658  | 0.1214  | C | -2.8839 | -0.9331 | 1.1862  |
| H | -1.8352 | 1.6835  | 3.0300  | H | 0.2246  | -1.4517 | 2.5738  |

---

---

|   |         |         |         |   |         |         |         |
|---|---------|---------|---------|---|---------|---------|---------|
| H | 2.0315  | 0.5507  | 1.5906  | H | -3.5843 | -2.7856 | 3.9417  |
| H | 1.0673  | -0.4003 | -0.4395 | H | -4.7054 | -1.7194 | 2.0130  |
| C | -3.2112 | 0.3922  | 0.7767  | C | -0.8847 | -0.1780 | 0.1910  |
| C | -4.3209 | 0.7862  | 1.4685  | C | 0.4449  | -0.0067 | -0.0772 |
| C | -4.2439 | 1.6188  | 2.6202  | C | 1.4416  | -0.2926 | 0.8976  |
| C | -5.6449 | 0.3737  | 1.1442  | C | 0.9261  | 0.4475  | -1.3368 |
| N | -4.1947 | 2.2874  | 3.5609  | N | 2.2300  | -0.4697 | 1.7217  |
| N | -6.7245 | 0.0276  | 0.9249  | N | 1.2958  | 0.7717  | -2.3813 |
| N | -5.0508 | -2.3418 | -3.0440 | N | -3.1967 | 2.1935  | -3.5864 |
| O | -6.1890 | -2.0113 | -2.7567 | O | -2.1530 | 2.7591  | -3.8816 |
| O | -4.7469 | -3.1502 | -3.9146 | O | -4.2385 | 2.2559  | -4.2250 |
| N | -0.2891 | -1.3933 | -2.7005 | N | -5.7750 | -0.1771 | -0.2488 |
| O | -0.0908 | -2.3904 | -3.3836 | O | -6.7288 | 0.4346  | -0.7133 |
| O | 0.5186  | -0.4915 | -2.5329 | O | -5.8933 | -1.1260 | 0.5186  |
| N | 0.7422  | 1.7572  | 3.5906  | N | -0.9828 | -2.8394 | 4.4665  |
| O | 1.9167  | 1.5000  | 3.8199  | O | -1.7037 | -3.3368 | 5.3201  |
| O | 0.0360  | 2.4781  | 4.2856  | O | 0.2412  | -2.8680 | 4.4783  |

---

---

Z-2·10 complex E  
E = -4085.49669399

Z-2·10 complex F  
E = -4085.49547824

|   |         |         |         |   |         |         |         |
|---|---------|---------|---------|---|---------|---------|---------|
| C | -4.5956 | 2.4307  | -1.0036 | C | 4.6404  | 2.6306  | -0.4732 |
| O | -7.8968 | 1.2782  | -1.6624 | O | 8.0161  | 1.6972  | -1.0916 |
| C | -3.6229 | 3.4139  | -1.2012 | C | 3.6620  | 3.6269  | -0.5080 |
| C | -6.2571 | 3.6940  | -2.2262 | C | 6.3653  | 4.1638  | -1.1967 |
| C | -5.3119 | 4.6921  | -2.4269 | C | 5.4139  | 5.1757  | -1.2309 |
| C | -4.0140 | 4.5454  | -1.9226 | C | 4.0827  | 4.9031  | -0.8935 |
| C | -5.8918 | 2.5584  | -1.5066 | C | 5.9704  | 2.8845  | -0.8118 |
| C | -6.7596 | 1.3945  | -1.2306 | C | 6.8431  | 1.6937  | -0.7496 |
| C | -6.0093 | 0.3662  | -0.4408 | C | 6.0585  | 0.4985  | -0.2983 |
| C | -6.4341 | -0.8544 | -0.0107 | C | 6.4789  | -0.7879 | -0.1387 |
| C | -7.8884 | -1.3594 | 0.0993  | C | 7.9366  | -1.2939 | -0.0724 |
| C | -4.3193 | -4.2004 | 1.5037  | C | 4.3550  | -4.4192 | 0.4028  |
| C | -5.7017 | -4.0607 | 1.6195  | C | 5.7317  | -4.3088 | 0.5885  |
| C | -6.3196 | -2.9293 | 1.1021  | C | 6.3500  | -3.0794 | 0.4006  |
| C | -7.7713 | -2.5607 | 1.0953  | C | 7.7952  | -2.7205 | 0.5515  |
| C | -4.1815 | -2.1078 | 0.3146  | C | 4.2258  | -2.0900 | -0.2075 |
| C | -3.5513 | -3.2343 | 0.8392  | C | 3.5937  | -3.3149 | -0.0036 |
| C | -8.8806 | -0.3335 | 0.6624  | C | 8.4957  | -1.4151 | -1.5047 |
| C | -5.5606 | -1.9291 | 0.4748  | C | 5.6006  | -1.9532 | 0.0241  |
| C | -8.3490 | -1.8756 | -1.2791 | C | 8.8623  | -0.4488 | 0.8136  |
| H | -3.8274 | -5.0771 | 1.9095  | H | 3.8620  | -5.3724 | 0.5563  |
| H | -8.4183 | -3.3914 | 0.8021  | H | 8.0664  | -2.6946 | 1.6122  |
| H | -8.0848 | -2.2466 | 2.0966  | H | 8.4621  | -3.4392 | 0.0682  |
| H | -9.8247 | -0.8389 | 0.8877  | H | 9.5059  | -1.8336 | -1.4703 |
| H | -8.5004 | 0.0991  | 1.5917  | H | 7.8707  | -2.0785 | -2.1087 |
| H | -9.0792 | 0.4661  | -0.0449 | H | 8.5418  | -0.4368 | -1.9799 |
| H | -8.3702 | -1.0603 | -2.0005 | H | 9.0773  | 0.5174  | 0.3677  |
| H | -7.6791 | -2.6592 | -1.6434 | H | 8.4148  | -0.2957 | 1.7993  |
| H | -9.3558 | -2.2955 | -1.1972 | H | 9.8068  | -0.9837 | 0.9521  |
| H | -7.2655 | 3.7686  | -2.6153 | H | 7.4009  | 4.3370  | -1.4635 |
| H | -5.5717 | 5.5863  | -2.9802 | H | 5.6956  | 6.1797  | -1.5236 |
| H | -3.2813 | 5.3269  | -2.0913 | H | 3.3468  | 5.6989  | -0.9280 |
| S | -4.3353 | 0.9309  | -0.1349 | S | 4.3475  | 0.9610  | -0.0318 |
| H | -6.2871 | -4.8321 | 2.1074  | H | 6.3130  | -5.1769 | 0.8789  |
| H | -3.5945 | -1.4067 | -0.2574 | H | 3.6375  | -1.2683 | -0.5838 |
| C | -2.2255 | 3.2716  | -0.6926 | C | 2.2326  | 3.3623  | -0.1639 |
| C | -1.2021 | 2.8659  | -1.5695 | C | 1.2836  | 3.1987  | -1.1912 |
| C | -1.9153 | 3.5921  | 0.6410  | C | 1.8207  | 3.3353  | 1.1797  |
| C | 0.1142  | 2.8354  | -1.1145 | C | -0.0646 | 3.0770  | -0.8601 |
| C | -0.5827 | 3.5666  | 1.0525  | C | 0.4601  | 3.2244  | 1.4699  |
| C | 0.4604  | 3.2058  | 0.1909  | C | -0.5094 | 3.1202  | 0.4676  |
| H | 0.8825  | 2.5078  | -1.8031 | H | -0.7829 | 2.9477  | -1.6604 |
| H | -0.3633 | 3.8698  | 2.0676  | H | 0.1566  | 3.2719  | 2.5083  |
| C | -2.0736 | -3.3763 | 0.6774  | C | 2.1177  | -3.4095 | -0.2037 |
| C | -1.5327 | -3.7638 | -0.5611 | C | 1.2631  | -3.4743 | 0.9119  |
| C | -1.2146 | -3.0652 | 1.7466  | C | 1.5707  | -3.3771 | -1.4990 |
| C | -0.1487 | -3.8091 | -0.7147 | C | -0.1158 | -3.4625 | 0.7161  |
| C | 0.1637  | -3.0979 | 1.5455  | C | 0.1860  | -3.3886 | -1.6535 |
| C | 0.7280  | -3.4470 | 0.3138  | C | -0.6862 | -3.4001 | -0.5597 |
| H | 0.2440  | -4.1157 | -1.6745 | H | -0.7492 | -3.4577 | 1.5930  |
| H | 0.8008  | -2.7975 | 2.3668  | H | -0.2117 | -3.3713 | -2.6593 |
| C | 2.1953  | -3.3751 | 0.0871  | C | -2.1568 | -3.2891 | -0.7421 |
| C | 3.0806  | -3.2556 | 1.1638  | C | -2.7003 | -2.8649 | -1.9603 |
| C | 2.7205  | -3.3678 | -1.2104 | C | -3.0287 | -3.5524 | 0.3197  |
| C | 4.4517  | -3.1415 | 0.9470  | C | -4.0806 | -2.7344 | -2.1148 |
| H | 2.7429  | -3.2649 | 2.1897  | H | -2.0780 | -2.5941 | -2.7997 |
| C | 4.0954  | -3.2651 | -1.4201 | C | -4.4054 | -3.4067 | 0.1630  |
| H | 2.0863  | -3.4039 | -2.0830 | H | -2.6760 | -3.8936 | 1.2817  |

---

---

|   |         |         |         |   |         |         |         |
|---|---------|---------|---------|---|---------|---------|---------|
| C | 4.9819  | -3.1574 | -0.3456 | C | -4.9536 | -3.0100 | -1.0590 |
| H | 6.0429  | -3.0570 | -0.5057 | H | -6.0186 | -2.8890 | -1.1705 |
| C | 1.8764  | 3.2201  | 0.6435  | C | -1.9559 | 3.0638  | 0.8000  |
| C | 2.9182  | 3.1984  | -0.2821 | C | -2.3707 | 2.6166  | 2.0685  |
| C | 2.1889  | 3.2468  | 2.0162  | C | -2.9209 | 3.4434  | -0.1290 |
| C | 4.2543  | 3.2296  | 0.1396  | C | -3.7234 | 2.5545  | 2.3773  |
| H | 2.7372  | 3.1891  | -1.3468 | H | -1.6370 | 2.2867  | 2.7863  |
| C | 3.5191  | 3.2914  | 2.4261  | C | -4.2837 | 3.3706  | 0.1889  |
| H | 1.4004  | 3.2098  | 2.7502  | H | -2.6525 | 3.8234  | -1.1042 |
| C | 4.5649  | 3.2936  | 1.4903  | C | -4.6951 | 2.9251  | 1.4398  |
| H | 5.5792  | 3.3172  | 1.8591  | H | -5.7338 | 2.8451  | 1.7230  |
| C | -1.5193 | 2.4595  | -2.9875 | C | 1.7159  | 3.1425  | -2.6348 |
| H | -1.8909 | 3.3051  | -3.5719 | H | 2.4571  | 2.3547  | -2.7867 |
| H | -0.6296 | 2.0715  | -3.4871 | H | 0.8654  | 2.9385  | -3.2872 |
| H | -2.2907 | 1.6871  | -3.0126 | H | 2.1719  | 4.0828  | -2.9541 |
| C | -2.9959 | 3.9618  | 1.6253  | C | 2.8216  | 3.4398  | 2.3029  |
| H | -3.7155 | 4.6577  | 1.1901  | H | 3.5312  | 4.2520  | 2.1328  |
| H | -3.5493 | 3.0710  | 1.9368  | H | 2.3200  | 3.6110  | 3.2564  |
| H | -2.5676 | 4.4160  | 2.5198  | H | 3.4011  | 2.5162  | 2.3908  |
| C | -2.4221 | -4.0912 | -1.7350 | C | 1.8129  | -3.5130 | 2.3170  |
| H | -3.2912 | -4.6771 | -1.4310 | H | 2.1928  | -4.5079 | 2.5668  |
| H | -2.7944 | -3.1760 | -2.2048 | H | 2.6418  | -2.8154 | 2.4440  |
| H | -1.8700 | -4.6504 | -2.4917 | H | 1.0361  | -3.2682 | 3.0439  |
| C | -1.7635 | -2.6596 | 3.0922  | C | 2.4511  | -3.2978 | -2.7219 |
| H | -2.5764 | -1.9391 | 2.9937  | H | 2.7772  | -2.2684 | -2.8976 |
| H | -2.1647 | -3.5228 | 3.6312  | H | 3.3476  | -3.9103 | -2.6137 |
| H | -0.9813 | -2.2186 | 3.7133  | H | 1.9070  | -3.6272 | -3.6083 |
| O | 5.1768  | 3.1619  | -0.8570 | O | -4.2089 | 2.0842  | 3.5605  |
| O | 4.4886  | -3.2236 | -2.7239 | O | -5.1457 | -3.6388 | 1.2810  |
| O | 5.2076  | -2.9749 | 2.0672  | O | -4.4947 | -2.2765 | -3.3288 |
| O | 3.9163  | 3.3059  | 3.7228  | O | -5.1383 | 3.7427  | -0.8021 |
| C | 6.6232  | -3.1147 | 1.9628  | C | -5.8924 | -2.1978 | -3.5809 |
| H | 7.0642  | -2.3008 | 1.3815  | H | -6.3985 | -1.5484 | -2.8608 |
| H | 6.9983  | -3.0620 | 2.9826  | H | -5.9921 | -1.7740 | -4.5777 |
| H | 6.8855  | -4.0812 | 1.5218  | H | -6.3534 | -3.1905 | -3.5543 |
| C | 2.9174  | 3.3349  | 4.7403  | C | -6.5280 | 3.8368  | -0.4924 |
| H | 3.4610  | 3.3678  | 5.6816  | H | -7.0090 | 4.1761  | -1.4072 |
| H | 2.2883  | 4.2258  | 4.6458  | H | -6.9431 | 2.8656  | -0.2112 |
| H | 2.2988  | 2.4346  | 4.7160  | H | -6.7009 | 4.5611  | 0.3095  |
| C | 5.8810  | -3.1919 | -3.0104 | C | -6.5635 | -3.7314 | 1.1550  |
| H | 5.9615  | -3.1166 | -4.0924 | H | -6.9262 | -4.0215 | 2.1386  |
| H | 6.3691  | -2.3259 | -2.5529 | H | -7.0047 | -2.7683 | 0.8860  |
| H | 6.3753  | -4.1058 | -2.6652 | H | -6.8381 | -4.4939 | 0.4198  |
| C | 6.5593  | 3.2616  | -0.5127 | C | -3.3116 | 1.9778  | 4.6644  |
| H | 6.8622  | 2.4572  | 0.1624  | H | -2.8255 | 2.9378  | 4.8622  |
| H | 7.1017  | 3.1632  | -1.4500 | H | -3.9244 | 1.6888  | 5.5150  |
| H | 6.7756  | 4.2312  | -0.0537 | H | -2.5530 | 1.2079  | 4.5027  |
| C | -0.9523 | -0.0936 | 0.4073  | C | 0.9674  | -0.2118 | 0.5863  |
| C | -0.4024 | 0.2814  | 1.6171  | C | 0.4733  | -0.2993 | 1.8721  |
| C | 0.9655  | 0.2686  | 1.8460  | C | -0.8805 | -0.4498 | 2.1409  |
| C | 1.7953  | -0.0143 | 0.7752  | C | -1.7611 | -0.3838 | 1.0751  |
| C | 1.2832  | -0.2729 | -0.5264 | C | -1.3092 | -0.1574 | -0.2548 |
| C | -0.1048 | -0.3995 | -0.6516 | C | 0.0722  | -0.1777 | -0.4761 |
| H | -2.0190 | -0.1103 | 0.2711  | H | 2.0267  | -0.1449 | 0.4107  |
| H | 1.3384  | 0.5249  | 2.8224  | H | -1.2023 | -0.5695 | 3.1626  |
| C | 3.6042  | -0.0122 | -0.7096 | C | -3.6408 | 0.0507  | -0.2542 |
| C | 4.8313  | 0.1398  | -1.3353 | C | -4.9007 | 0.3531  | -0.7516 |
| C | 4.8540  | 0.1054  | -2.7229 | C | -4.9829 | 0.8100  | -2.0588 |
| C | 3.7102  | -0.0799 | -3.4882 | C | -3.8681 | 0.9645  | -2.8731 |
| C | 2.4818  | -0.2473 | -2.8582 | C | -2.6128 | 0.6327  | -2.3844 |
| C | 2.4198  | -0.2290 | -1.4671 | C | -2.4904 | 0.1613  | -1.0787 |
| H | 5.7509  | 0.2972  | -0.7993 | H | -5.7994 | 0.2717  | -0.1643 |

---

---

|   |         |         |         |   |         |         |         |
|---|---------|---------|---------|---|---------|---------|---------|
| H | 3.7933  | -0.1001 | -4.5648 | H | -3.9977 | 1.3366  | -3.8783 |
| H | 1.5993  | -0.4135 | -3.4511 | H | -1.7526 | 0.7266  | -3.0228 |
| C | 3.2619  | 0.0403  | 0.7135  | C | -3.2363 | -0.3661 | 1.0890  |
| C | 4.1169  | 0.0928  | 1.7778  | C | -4.0496 | -0.6904 | 2.1385  |
| C | 5.5278  | 0.1547  | 1.6224  | C | -5.4652 | -0.5825 | 2.0717  |
| C | 3.6762  | 0.0287  | 3.1289  | C | -3.5507 | -1.1945 | 3.3705  |
| N | 6.6754  | 0.2176  | 1.5016  | N | -6.6154 | -0.4860 | 2.0208  |
| N | 3.3247  | -0.0368 | 4.2273  | N | -3.1479 | -1.6073 | 4.3718  |
| N | -1.2905 | 0.7322  | 2.6979  | N | 1.4152  | -0.2224 | 2.9997  |
| O | -0.7663 | 1.2519  | 3.6757  | O | 0.9375  | -0.1568 | 4.1247  |
| O | -2.4938 | 0.5812  | 2.5455  | O | 2.6104  | -0.2088 | 2.7404  |
| N | -0.7645 | -0.8571 | -1.8839 | N | 0.6753  | -0.1969 | -1.8187 |
| O | -1.9721 | -0.6869 | -1.9778 | O | -0.0494 | -0.4340 | -2.7750 |
| O | -0.0825 | -1.4197 | -2.7294 | O | 1.8821  | -0.0232 | -1.9002 |
| N | 6.1486  | 0.2689  | -3.4045 | N | -6.3065 | 1.1505  | -2.6005 |
| O | 6.1686  | 0.1548  | -4.6222 | O | -7.2834 | 0.9420  | -1.8867 |
| O | 7.1320  | 0.4981  | -2.7084 | O | -6.3599 | 1.6114  | -3.7316 |

---

| Z-2-10 complex G<br>E = -4085.49114633 |         |         | Z-2-10 complex H<br>E = -4085.49101506 |   |         | Z-2-10 I<br>E = -4085.49009954 |         |   |         |         |         |
|----------------------------------------|---------|---------|----------------------------------------|---|---------|--------------------------------|---------|---|---------|---------|---------|
| C                                      | 5.1402  | 1.9799  | -1.0397                                | C | -4.3606 | 2.7148                         | -0.4774 | C | -5.1333 | 2.0031  | -1.0721 |
| O                                      | 8.1835  | 0.1572  | -1.1313                                | O | -7.6939 | 1.9027                         | -1.4163 | O | -8.1988 | 0.2205  | -1.2128 |
| C                                      | 4.4634  | 3.1772  | -1.2847                                | C | -3.3434 | 3.6715                         | -0.4352 | C | -4.4386 | 3.1935  | -1.2998 |
| C                                      | 7.2501  | 2.9205  | -1.7452                                | C | -5.9318 | 4.2937                         | -1.4237 | C | -7.2206 | 2.9730  | -1.8056 |
| C                                      | 6.5983  | 4.1198  | -2.0050                                | C | -4.9392 | 5.2648                         | -1.3870 | C | -6.5501 | 4.1651  | -2.0503 |
| C                                      | 5.2214  | 4.2421  | -1.7722                                | C | -3.6650 | 4.9499                         | -0.9009 | C | -5.1758 | 4.2696  | -1.7949 |
| C                                      | 6.5110  | 1.8467  | -1.2514                                | C | -5.6355 | 3.0135                         | -0.9613 | C | -6.5025 | 1.8881  | -1.3051 |
| C                                      | 7.0330  | 0.5072  | -0.9155                                | C | -6.5651 | 1.8659                         | -0.9502 | C | -7.0467 | 0.5547  | -0.9806 |
| C                                      | 5.9380  | -0.3504 | -0.3477                                | C | -5.8923 | 0.6599                         | -0.3719 | C | -5.9712 | -0.3186 | -0.4009 |
| C                                      | 6.0273  | -1.6126 | 0.1585                                 | C | -6.4072 | -0.5859                        | -0.1764 | C | -6.0840 | -1.5810 | 0.0997  |
| C                                      | 7.3269  | -2.3730 | 0.5130                                 | C | -7.8936 | -1.0040                        | -0.1832 | C | -7.3969 | -2.3252 | 0.4382  |
| C                                      | 3.1279  | -4.5175 | 1.2354                                 | C | -4.5449 | -4.2812                        | 0.7350  | C | -3.2337 | -4.5263 | 1.1956  |
| C                                      | 4.4783  | -4.6382 | 1.5487                                 | C | -5.9203 | -4.0781                        | 0.8444  | C | -4.5881 | -4.6288 | 1.4990  |
| C                                      | 5.3549  | -3.6296 | 1.1737                                 | C | -6.4542 | -2.8340                        | 0.5334  | C | -5.4483 | -3.6083 | 1.1180  |
| C                                      | 6.8266  | -3.5405 | 1.4195                                 | C | -7.8800 | -2.3771                        | 0.5677  | C | -6.9212 | -3.4994 | 1.3498  |
| C                                      | 3.5366  | -2.4011 | 0.1458                                 | C | -4.2479 | -2.0182                        | -0.0381 | C | -3.6060 | -2.4038 | 0.1050  |
| C                                      | 2.6472  | -3.4041 | 0.5314                                 | C | -3.7010 | -3.2586                        | 0.2812  | C | -2.7333 | -3.4194 | 0.4955  |
| C                                      | 7.9382  | -2.9595 | -0.7761                                | C | -8.8334 | -0.0390                        | 0.5517  | C | -8.4292 | -1.4884 | 1.2071  |
| C                                      | 4.8964  | -2.4970 | 0.4802                                 | C | -5.6181 | -1.7857                        | 0.1186  | C | -4.9688 | -2.4812 | 0.4299  |
| C                                      | 8.3602  | -1.5485 | 1.2939                                 | C | -8.3505 | -1.2194                        | -1.6405 | C | -8.0001 | -2.9029 | -0.8586 |
| H                                      | 2.4317  | -5.2970 | 1.5240                                 | H | -4.1188 | -5.2472                        | 0.9805  | H | -2.5508 | -5.3162 | 1.4873  |
| H                                      | 7.0142  | -3.3056 | 2.4727                                 | H | -8.5660 | -3.0934                        | 0.1084  | H | -7.4565 | -4.4259 | 1.1263  |
| H                                      | 7.3514  | -4.4742 | 1.2011                                 | H | -8.2060 | -2.2389                        | 1.6040  | H | -7.1160 | -3.2615 | 2.4010  |
| H                                      | 8.8228  | -3.5525 | -0.5255                                | H | -9.8121 | -0.5149                        | 0.6661  | H | -9.2153 | -2.1525 | 1.5796  |
| H                                      | 7.2204  | -3.6122 | -1.2807                                | H | -8.4497 | 0.1852                         | 1.5507  | H | -7.9629 | -1.0028 | 2.0685  |
| H                                      | 8.2352  | -2.1621 | -1.4544                                | H | -8.9657 | 0.8905                         | 0.0065  | H | -8.8905 | -0.7320 | 0.5801  |
| H                                      | 8.8384  | -0.7981 | 0.6726                                 | H | -8.3014 | -0.2836                        | -2.1948 | H | -8.2789 | -2.1011 | -1.5394 |
| H                                      | 7.8896  | -1.0571 | 2.1497                                 | H | -7.7228 | -1.9639                        | -2.1376 | H | -7.2847 | -3.5640 | -1.3554 |
| H                                      | 9.1335  | -2.2222 | 1.6759                                 | H | -9.3836 | -1.5787                        | -1.6526 | H | -8.8951 | -3.4850 | -0.6192 |
| H                                      | 8.3131  | 2.7958  | -1.9134                                | H | -6.9257 | 4.4989                         | -1.8028 | H | -8.2824 | 2.8621  | -1.9902 |
| H                                      | 7.1523  | 4.9690  | -2.3860                                | H | -5.1447 | 6.2692                         | -1.7364 | H | -7.0876 | 5.0226  | -2.4363 |
| H                                      | 4.7240  | 5.1852  | -1.9703                                | H | -2.8962 | 5.7144                         | -0.8764 | H | -4.6641 | 5.2077  | -1.9797 |
| S                                      | 4.3757  | 0.5226  | -0.4409                                | S | -4.1885 | 1.0481                         | 0.0438  | S | -4.3957 | 0.5337  | -0.4691 |
| H                                      | 4.8405  | -5.5115 | 2.0797                                 | H | -6.5652 | -4.8878                        | 1.1674  | H | -4.9661 | -5.4979 | 2.0260  |
| H                                      | 3.1580  | -1.5783 | -0.4393                                | H | -3.6011 | -1.2603                        | -0.4504 | H | -3.2111 | -1.5856 | -0.4765 |
| C                                      | 3.0026  | 3.2747  | -1.0020                                | C | -1.9721 | 3.3679                         | 0.0711  | C | -2.9823 | 3.2759  | -0.9904 |
| C                                      | 2.5671  | 3.6313  | 0.2870                                 | C | -0.9212 | 3.1644                         | -0.8423 | C | -2.5679 | 3.5974  | 0.3147  |
| C                                      | 2.0668  | 2.9623  | -2.0011                                | C | -1.7115 | 3.3457                         | 1.4536  | C | -2.0303 | 2.9887  | -1.9818 |
| C                                      | 1.2000  | 3.6933  | 0.5466                                 | C | 0.3763  | 3.0018                         | -0.3634 | C | -1.2051 | 3.6533  | 0.5977  |
| C                                      | 0.7072  | 3.0222  | -1.6983                                | C | -0.3970 | 3.1925                         | 1.8931  | C | -0.6757 | 3.0429  | -1.6565 |
| C                                      | 0.2430  | 3.3896  | -0.4302                                | C | 0.6732  | 3.0376                         | 1.0043  | C | -0.2326 | 3.3781  | -0.3720 |
| H                                      | 0.8849  | 3.9955  | 1.5367                                 | H | 1.1685  | 2.8292                         | -1.0808 | H | -0.9061 | 3.9298  | 1.6002  |
| H                                      | 0.0021  | 2.7624  | -2.4775                                | H | -0.2077 | 3.2360                         | 2.9580  | H | 0.0422  | 2.8043  | -2.4307 |
| C                                      | 1.1899  | -3.3067 | 0.2140                                 | C | -2.2294 | -3.4464                        | 0.1243  | C | -1.2758 | -3.3365 | 0.1777  |
| C                                      | 0.2766  | -2.9801 | 1.2300                                 | C | -1.6725 | -3.5727                        | -1.1612 | C | -0.8161 | -3.5688 | -1.1319 |
| C                                      | 0.7187  | -3.5682 | -1.0859                                | C | -1.3895 | -3.4214                        | 1.2519  | C | -0.3538 | -3.0385 | 1.1947  |
| C                                      | -1.0836 | -2.9055 | 0.9320                                 | C | -0.2884 | -3.6455                        | -1.2968 | C | 0.5494  | -3.4941 | -1.3981 |
| C                                      | -0.6500 | -3.5023 | -1.3417                                | C | -0.0080 | -3.4648                        | 1.0712  | C | 1.0040  | -2.9569 | 0.8872  |
| C                                      | -1.5795 | -3.1654 | -0.3494                                | C | 0.5736  | -3.5582                        | -0.1975 | C | 1.4862  | -3.1782 | -0.4062 |
| H                                      | -1.7603 | -2.6107 | 1.7234                                 | H | 0.1201  | -3.7649                        | -2.2916 | H | 0.8841  | -3.7050 | -2.4057 |
| H                                      | -0.9921 | -3.7435 | -2.3401                                | H | 0.6226  | -3.3699                        | 1.9462  | H | 1.6881  | -2.6834 | 1.6800  |
| C                                      | -3.0321 | -3.0629 | -0.6468                                | C | 2.0449  | -3.4866                        | -0.3799 | C | 2.9326  | -3.0542 | -0.7228 |
| C                                      | -3.4811 | -2.9178 | -1.9745                                | C | 2.9143  | -3.7375                        | 0.6899  | C | 3.8928  | -3.0792 | 0.2949  |
| C                                      | -3.9688 | -3.0768 | 0.3838                                 | C | 2.5723  | -3.0763                        | -1.6105 | C | 3.3612  | -2.8794 | -2.0433 |
| C                                      | -4.8445 | -2.8337 | -2.2451                                | C | 4.2872  | -3.5389                        | 0.5321  | C | 5.2446  | -2.9374 | -0.0072 |
| H                                      | -2.7688 | -2.8539 | -2.7806                                | H | 2.5225  | -4.0768                        | 1.6355  | H | 3.6259  | -3.2188 | 1.3323  |
| C                                      | -5.3338 | -2.9498 | 0.1046                                 | C | 3.9499  | -2.9049                        | -1.7598 | C | 4.7199  | -2.7782 | -2.3449 |
| H                                      | -3.6819 | -3.1935 | 1.4186                                 | H | 1.9089  | -2.8261                        | -2.4225 | H | 2.6676  | -2.8105 | -2.8679 |

|   |         |         |         |   |         |         |         |   |         |         |         |
|---|---------|---------|---------|---|---------|---------|---------|---|---------|---------|---------|
| C | -5.7842 | -2.8492 | -1.2052 | C | 4.8119  | -3.1227 | -0.6912 | C | 5.6811  | -2.8041 | -1.3291 |
| H | -6.8281 | -2.7536 | -1.4635 | H | 5.8762  | -2.9682 | -0.8020 | H | 6.7294  | -2.7037 | -1.5583 |
| C | -1.2103 | 3.4241  | -0.1212 | C | 2.0684  | 2.9061  | 1.4913  | C | 1.2155  | 3.4115  | -0.0401 |
| C | -1.6552 | 3.4103  | 1.2055  | C | 3.1411  | 3.2009  | 0.6385  | C | 2.1869  | 3.4719  | -1.0464 |
| C | -2.1666 | 3.4438  | -1.1436 | C | 2.3274  | 2.4625  | 2.7945  | C | 1.6398  | 3.3587  | 1.2925  |
| C | -3.0153 | 3.4208  | 1.4988  | C | 4.4559  | 3.0466  | 1.0860  | C | 3.5434  | 3.4870  | -0.7238 |
| H | -0.9683 | 3.3599  | 2.0363  | H | 2.9469  | 3.5744  | -0.3541 | H | 1.9251  | 3.5284  | -2.0930 |
| C | -3.5282 | 3.4564  | -0.8430 | C | 3.6477  | 2.3313  | 3.2380  | C | 2.9948  | 3.3716  | 1.6073  |
| H | -1.8893 | 3.4702  | -2.1874 | H | 1.5091  | 2.1938  | 3.4436  | H | 0.9402  | 3.2764  | 2.1101  |
| C | -3.9719 | 3.4597  | 0.4806  | C | 4.7145  | 2.6178  | 2.3839  | C | 3.9665  | 3.4517  | 0.6061  |
| H | -5.0243 | 3.4575  | 0.7125  | H | 5.7333  | 2.5007  | 2.7263  | H | 5.0151  | 3.4520  | 0.8546  |
| C | 3.5620  | 3.9269  | 1.3812  | C | -1.1884 | 3.1068  | -2.3262 | C | -3.5796 | 3.8630  | 1.4012  |
| H | 4.2357  | 4.7392  | 1.0983  | H | -1.5224 | 4.0731  | -2.7124 | H | -4.1957 | 2.9784  | 1.5853  |
| H | 3.0555  | 4.2003  | 2.3068  | H | -0.2847 | 2.8236  | -2.8698 | H | -3.0875 | 4.1253  | 2.3378  |
| H | 4.1855  | 3.0527  | 1.5885  | H | -1.9711 | 2.3811  | -2.5571 | H | -4.2586 | 4.6729  | 1.1241  |
| C | 2.5220  | 2.5331  | -3.3719 | C | -2.8242 | 3.4879  | 2.4606  | C | -2.4629 | 2.5897  | -3.3691 |
| H | 3.0919  | 1.6024  | -3.3144 | H | -3.5351 | 4.2630  | 2.1689  | H | -3.0997 | 3.3527  | -3.8230 |
| H | 1.6694  | 2.3657  | -4.0315 | H | -3.3797 | 2.5494  | 2.5471  | H | -1.5993 | 2.4316  | -4.0166 |
| H | 3.1701  | 3.2845  | -3.8292 | H | -2.4267 | 3.7319  | 3.4466  | H | -3.0378 | 1.6607  | -3.3402 |
| C | 0.7481  | -2.6972 | 2.6345  | C | -2.5421 | -3.6038 | -2.3944 | C | -1.7807 | -3.8862 | -2.2451 |
| H | 1.0078  | -3.6229 | 3.1566  | H | -3.4465 | -4.1931 | -2.2348 | H | -2.5070 | -4.6427 | -1.9402 |
| H | 1.6436  | -2.0739 | 2.6348  | H | -2.8565 | -2.5944 | -2.6757 | H | -2.3444 | -2.9943 | -2.5323 |
| H | -0.0321 | -2.1983 | 3.2105  | H | -1.9946 | -4.0253 | -3.2388 | H | -1.2495 | -4.2474 | -3.1271 |
| C | 1.6756  | -3.9133 | -2.1972 | C | -1.9578 | -3.3085 | 2.6455  | C | -0.8139 | -2.7874 | 2.6093  |
| H | 2.2563  | -3.0350 | -2.4923 | H | -2.7499 | -2.5607 | 2.6970  | H | -1.7073 | -2.1614 | 2.6301  |
| H | 2.3882  | -4.6802 | -1.8854 | H | -2.3892 | -4.2591 | 2.9728  | H | -1.0724 | -3.7237 | 3.1126  |
| H | 1.1378  | -4.2735 | -3.0756 | H | -1.1801 | -3.0353 | 3.3612  | H | -0.0279 | -2.3036 | 3.1904  |
| O | -3.3360 | 3.3341  | 2.8228  | O | 5.5497  | 3.2549  | 0.3041  | O | 4.3995  | 3.4931  | -1.7833 |
| O | -6.1478 | -2.8944 | 1.1958  | O | 4.5293  | -2.4613 | -2.9126 | O | 5.0166  | -2.6330 | -3.6603 |
| O | -5.3745 | -2.6999 | -3.4853 | O | 5.1947  | -3.6891 | 1.5341  | O | 6.0830  | -2.9038 | 1.0685  |
| O | -4.3670 | 3.4185  | -1.9154 | O | 3.9906  | 1.9039  | 4.4766  | O | 3.2963  | 3.2452  | 2.9329  |
| C | -4.4883 | -2.5864 | -4.5961 | C | 4.7806  | -4.3258 | 2.7409  | C | 7.4885  | -2.8768 | 0.8343  |
| H | -3.8813 | -3.4912 | -4.7095 | H | 4.3632  | -5.3165 | 2.5355  | H | 7.7882  | -1.9683 | 0.3038  |
| H | -5.1284 | -2.4695 | -5.4680 | H | 5.6823  | -4.4254 | 3.3414  | H | 7.9501  | -2.8907 | 1.8197  |
| H | -3.8379 | -1.7139 | -4.5003 | H | 4.0539  | -3.7174 | 3.2855  | H | 7.8105  | -3.7573 | 0.2693  |
| C | -5.7555 | 3.6404  | -1.7036 | C | 2.9522  | 1.6157  | 5.4105  | C | 4.6244  | 3.5487  | 3.3558  |
| H | -6.2207 | 3.5634  | -2.6833 | H | 3.4586  | 1.3128  | 6.3240  | H | 4.6069  | 3.4967  | 4.4424  |
| H | -6.1960 | 2.8874  | -1.0434 | H | 2.3419  | 2.5036  | 5.6040  | H | 5.3453  | 2.8172  | 2.9821  |
| H | -5.9337 | 4.6349  | -1.2816 | H | 2.3193  | 0.7955  | 5.0634  | H | 4.9124  | 4.5558  | 3.0390  |
| C | -7.5557 | -2.8264 | 0.9792  | C | 3.7943  | -2.5918 | -4.1257 | C | 6.3810  | -2.5022 | -4.0446 |
| H | -8.0042 | -2.8010 | 1.9703  | H | 4.4684  | -2.2621 | -4.9142 | H | 6.3710  | -2.4109 | -5.1286 |
| H | -7.8300 | -1.9225 | 0.4274  | H | 3.5056  | -3.6338 | -4.2953 | H | 6.8301  | -1.6040 | -3.6125 |
| H | -7.9130 | -3.7079 | 0.4380  | H | 2.9022  | -1.9609 | -4.1331 | H | 6.9591  | -3.3881 | -3.7600 |
| C | -4.6749 | 3.6316  | 3.2149  | C | 5.3802  | 3.9223  | -0.9415 | C | 5.7820  | 3.7166  | -1.5412 |
| H | -5.3794 | 2.8785  | 2.8531  | H | 4.9763  | 4.9290  | -0.7935 | H | 6.2181  | 2.9409  | -0.9043 |
| H | -4.6743 | 3.6137  | 4.3027  | H | 6.3723  | 3.9764  | -1.3828 | H | 6.2628  | 3.6826  | -2.5159 |
| H | -4.9718 | 4.6240  | 2.8622  | H | 4.7231  | 3.3615  | -1.6125 | H | 5.9467  | 4.6946  | -1.0770 |
| C | -5.3470 | 0.1854  | 0.8504  | C | -0.7725 | -0.2316 | 0.2075  | C | 5.3432  | 0.1842  | 0.8852  |
| C | -5.0931 | 0.2212  | -0.5091 | C | -0.1920 | -0.1809 | 1.4605  | C | 5.0983  | 0.2559  | -0.4752 |
| C | -3.8069 | 0.2131  | -1.0326 | C | 1.1814  | -0.2476 | 1.6485  | C | 3.8164  | 0.2486  | -1.0124 |
| C | -2.7470 | 0.2027  | -0.1397 | C | 1.9893  | -0.2115 | 0.5248  | C | 2.7506  | 0.2058  | -0.1280 |
| C | -2.9573 | 0.2100  | 1.2632  | C | 1.4421  | -0.1346 | -0.7831 | C | 2.9506  | 0.1739  | 1.2769  |
| C | -4.2714 | 0.1520  | 1.7261  | C | 0.0545  | -0.2638 | -0.9077 | C | 4.2616  | 0.1158  | 1.7498  |
| H | -6.3579 | 0.1590  | 1.2244  | H | -1.8423 | -0.2317 | 0.0936  | H | 6.3512  | 0.1537  | 1.2665  |
| H | -3.6820 | 0.2390  | -2.1014 | H | 1.5745  | -0.2716 | 2.6493  | H | 3.6990  | 0.2899  | -2.0822 |
| C | -0.6456 | 0.2933  | 0.9166  | C | 3.7500  | 0.2239  | -0.9609 | C | 0.6415  | 0.2450  | 0.9160  |
| C | 0.6924  | 0.4609  | 1.2411  | C | 4.9520  | 0.5643  | -1.5624 | C | -0.6997 | 0.4000  | 1.2354  |
| C | 0.9844  | 0.7481  | 2.5712  | C | 4.9181  | 0.8848  | -2.9145 | C | -1.0021 | 0.6543  | 2.5693  |
| C | 0.0161  | 0.8567  | 3.5587  | C | 3.7489  | 0.8834  | -3.6635 | C | -0.0416 | 0.7396  | 3.5673  |
| C | -1.3178 | 0.6204  | 3.2403  | C | 2.5453  | 0.5352  | -3.0567 | C | 1.2949  | 0.5160  | 3.2528  |
| C | -1.6490 | 0.3419  | 1.9214  | C | 2.5410  | 0.1872  | -1.7097 | C | 1.6371  | 0.2740  | 1.9289  |
| H | 1.4893  | 0.4144  | 0.5145  | H | 5.8866  | 0.6173  | -1.0272 | H | -1.4911 | 0.3697  | 0.5022  |

---

|   |         |         |         |   |         |         |         |   |         |         |         |
|---|---------|---------|---------|---|---------|---------|---------|---|---------|---------|---------|
| H | 0.3154  | 1.1124  | 4.5654  | H | 3.7945  | 1.1463  | -4.7105 | H | -0.3492 | 0.9696  | 4.5776  |
| H | -2.0695 | 0.6759  | 4.0097  | H | 1.6386  | 0.5170  | -3.6395 | H | 2.0407  | 0.5557  | 4.0289  |
| C | -1.2971 | 0.1569  | -0.3939 | C | 3.4531  | -0.1204 | 0.4344  | C | 1.3026  | 0.1541  | -0.3935 |
| C | -0.7028 | -0.0403 | -1.6037 | C | 4.3445  | -0.3920 | 1.4295  | C | 0.7171  | -0.0038 | -1.6127 |
| C | 0.6885  | -0.2588 | -1.7969 | C | 5.7548  | -0.3370 | 1.2436  | C | -0.6718 | -0.2359 | -1.8110 |
| C | -1.4261 | -0.0924 | -2.8300 | C | 3.9339  | -0.8535 | 2.7116  | C | 1.4438  | 0.0187  | -2.8380 |
| N | 1.7856  | -0.4819 | -2.0775 | N | 6.9005  | -0.2993 | 1.1072  | N | -1.7698 | -0.4649 | -2.0823 |
| N | -1.9634 | -0.1265 | -3.8519 | N | 3.6002  | -1.2572 | 3.7409  | N | 1.9849  | 0.0602  | -3.8578 |
| N | -6.2334 | 0.2619  | -1.4401 | N | -1.0555 | -0.0526 | 2.6419  | N | 6.2438  | 0.3137  | -1.3911 |
| O | -5.9887 | 0.3282  | -2.6326 | O | -0.5071 | 0.0691  | 3.7314  | O | 6.0108  | 0.4365  | -2.5842 |
| O | -7.3599 | 0.2456  | -0.9528 | O | -2.2646 | -0.0571 | 2.4648  | O | 7.3684  | 0.2371  | -0.9051 |
| N | -4.6030 | -0.0130 | 3.1467  | N | -0.6116 | -0.4633 | -2.2004 | N | 4.5838  | -0.0889 | 3.1674  |
| O | -5.6453 | 0.4888  | 3.5461  | O | -1.8102 | -0.2335 | -2.2674 | O | 5.6193  | 0.4088  | 3.5894  |
| O | -3.8344 | -0.6737 | 3.8316  | O | 0.0627  | -0.8980 | -3.1279 | O | 3.8159  | -0.7759 | 3.8264  |
| N | 2.3871  | 0.9339  | 2.9688  | N | 6.1792  | 1.2667  | -3.5790 | N | -2.4080 | 0.8343  | 2.9588  |
| O | 3.2222  | 0.2382  | 2.4099  | O | 6.1842  | 1.2960  | -4.8022 | O | -2.6452 | 1.6444  | 3.8462  |
| O | 2.6191  | 1.7653  | 3.8377  | O | 7.1337  | 1.5365  | -2.8637 | O | -3.2404 | 0.1567  | 2.3745  |

---
